# Supplementary material
Source: Royal Society of Chemistry journal article supplement (doi:10.1039/d6cy00295a)
Supplement: d6cy00295a1.pdf [file d6cy00295a1.pdf]

## Supporting Information

### A coverage-corrected energetic span descriptor for comparing CO<sub>2</sub> hydrogenation activity and selectivity on Cu–In surfaces

Yu Zhang<sup>a</sup>, Xinxin Tian<sup>\*,b,c</sup> and Shuanglin Qu<sup>\*,a</sup>

<sup>a</sup> College of Chemistry and Chemical Engineering, Hunan University, Changsha 410082, P. R. China

<sup>b</sup> Institute of Molecular Science, Key Laboratory of Chemical Biology and Molecular Engineering of Ministry of Education, Shanxi University, Taiyuan 030006, P. R. China

<sup>c</sup> Shanxi Key Laboratory for the Green Catalysis Synthesis of Coal-based Value-added Chemicals, School of Chemistry and Chemical Engineering, Shanxi University, Taiyuan 030006, P. R. China

#### Corresponding Author:

Xinxin Tian: [tianxx@sxu.edu.cn](mailto:tianxx@sxu.edu.cn); Shuanglin Qu: [squ@hnu.edu.cn](mailto:squ@hnu.edu.cn)

#### Table of Contents

1. Computational model
2. Microkinetic analysis and adsorption energetics
3. Free-energy profiles and representative structures
4. Activity descriptors and free energies of formation
5. Identification of the preferred reaction pathway
6. Extended analysis and validation of the  $G_{HL}$  descriptor

## 1. Computational model

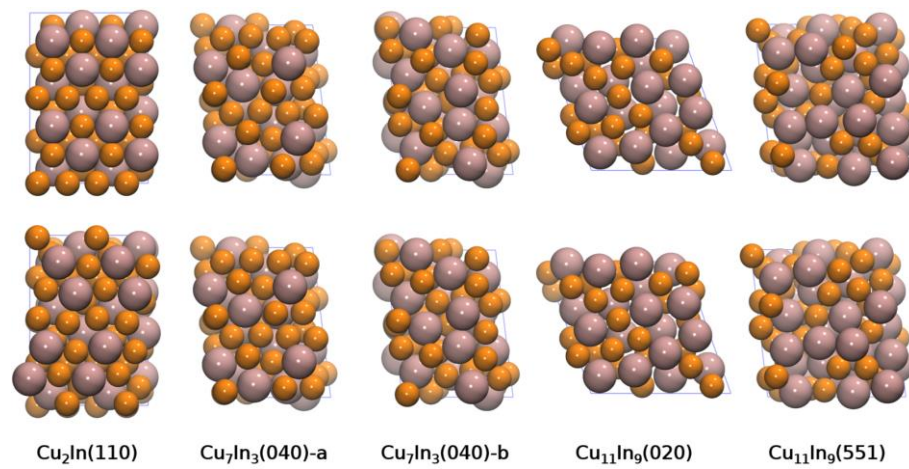

**Fig. S1.** Surfaces of the five Cu–In alloys: (top row) freshly cleaved surfaces and (bottom row) the corresponding surfaces after structural relaxation. Orange and coral spheres denote Cu and In atoms, respectively.

## 2. Microkinetic analysis and adsorption energetics

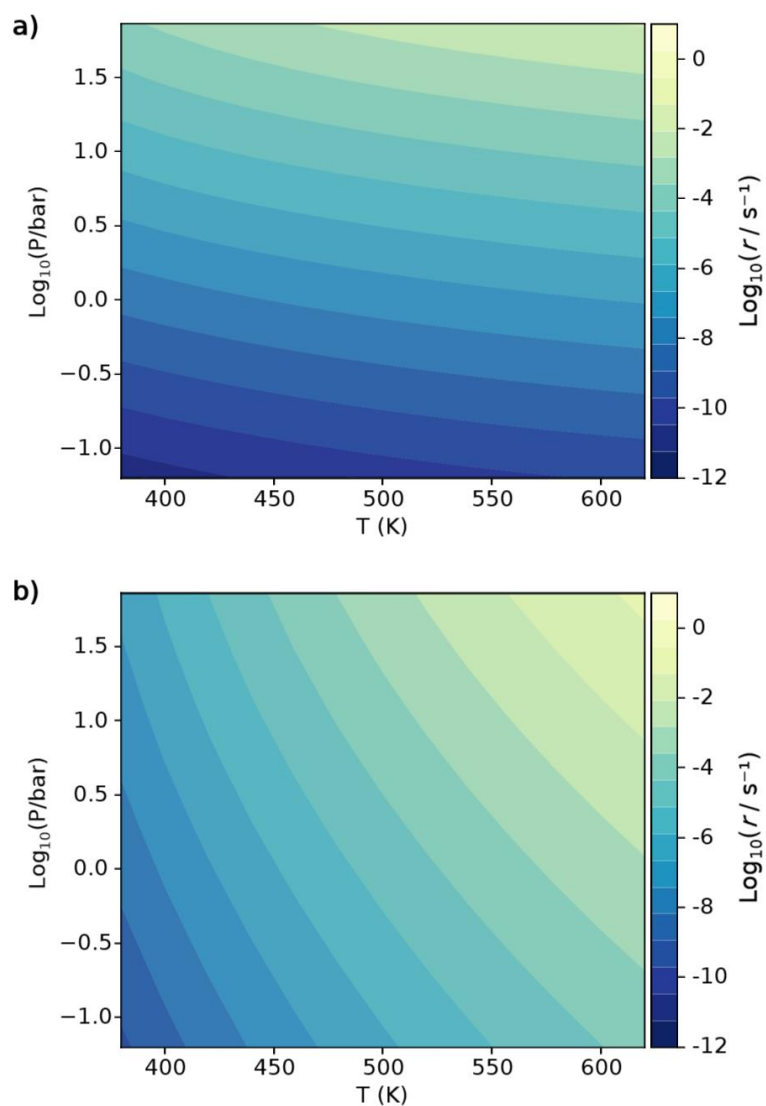

**Fig. S2.** Two-dimensional reaction rate maps for the formation of (a) methanol and (b) CO on the  $\text{Cu}_2\text{In}(110)$  surface as a function of temperature and pressure. Reaction rates are presented on a logarithmic ( $\log_{10}$ ) scale, as indicated by the color bar on the right.

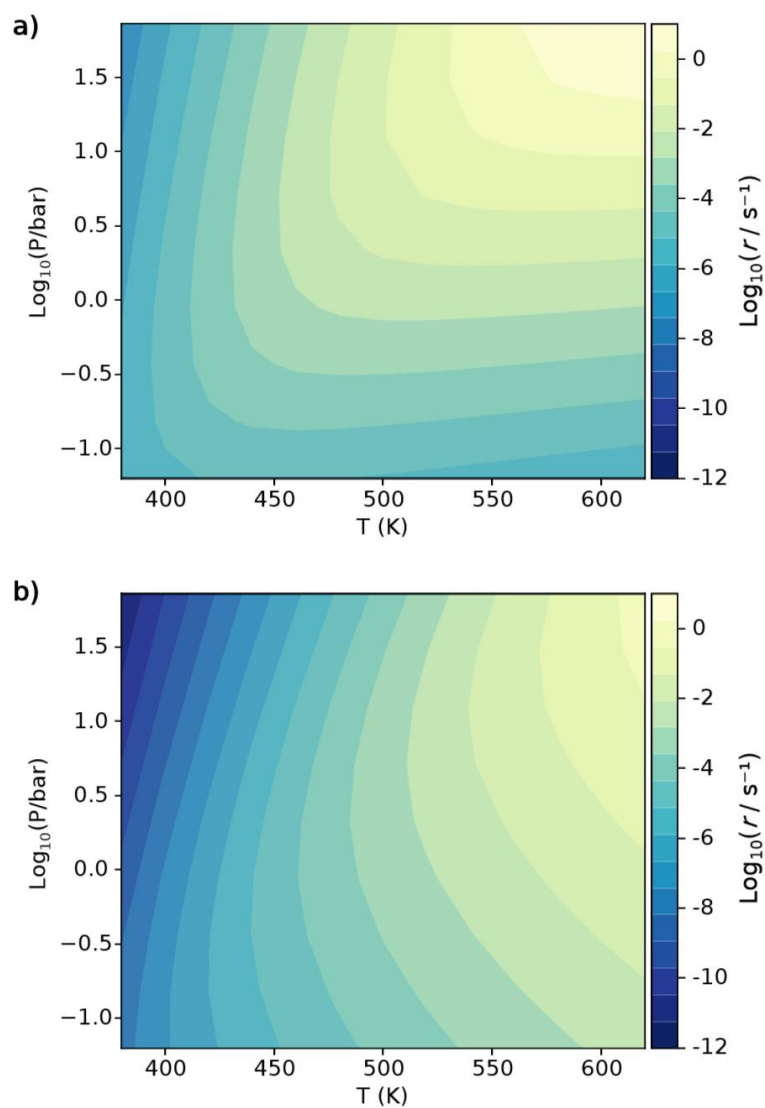

**Fig. S3.** Two-dimensional reaction rate maps for the formation of (a) methanol and (b) CO on the  $\text{Cu}_7\text{In}_3(040)\text{-a}$  surface as a function of temperature and pressure. Reaction rates are presented on a logarithmic ( $\text{log}_{10}$ ) scale, as indicated by the color bar on the right.

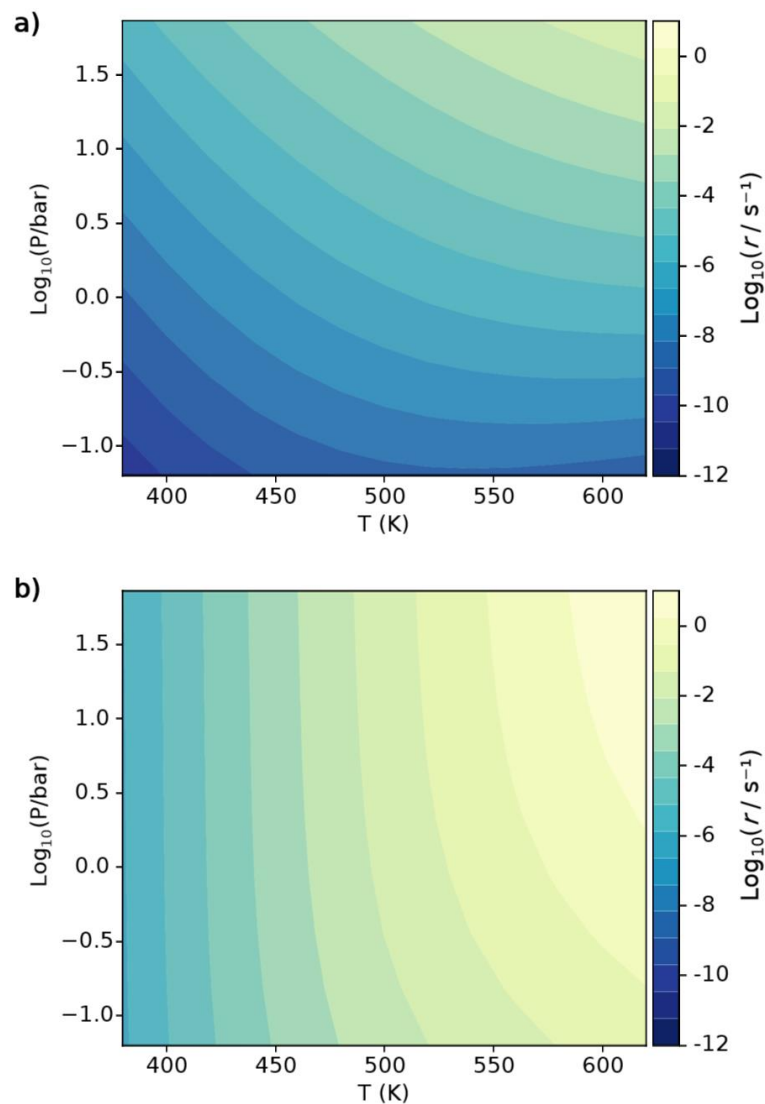

**Fig. S4.** Two-dimensional reaction rate maps for the formation of (a) methanol and (b) CO on the  $\text{Cu}_7\text{In}_3(040)\text{-b}$  surface as a function of temperature and pressure. Reaction rates are presented on a logarithmic ( $\text{log}_{10}$ ) scale, as indicated by the color bar on the right.

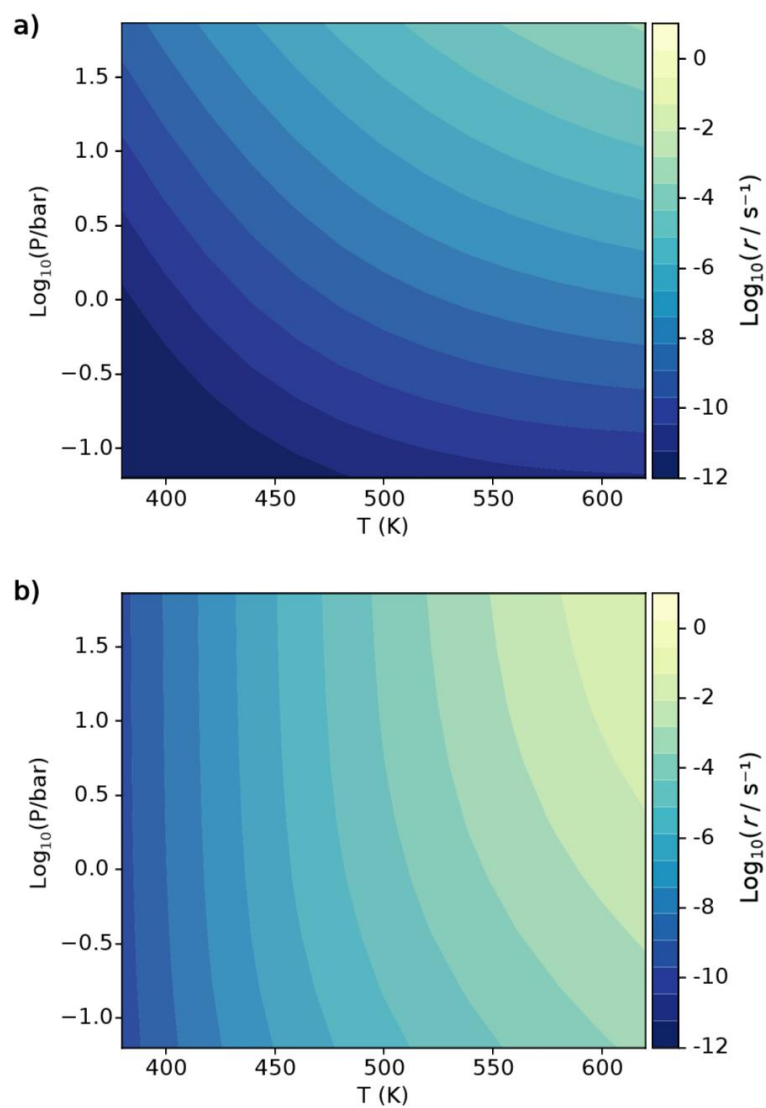

**Fig. S5.** Two-dimensional reaction rate maps for the formation of (a) methanol and (b) CO on the  $\text{Cu}_{11}\text{In}_9(020)$  surface as a function of temperature and pressure. Reaction rates are presented on a logarithmic ( $\log_{10}$ ) scale, as indicated by the color bar on the right.

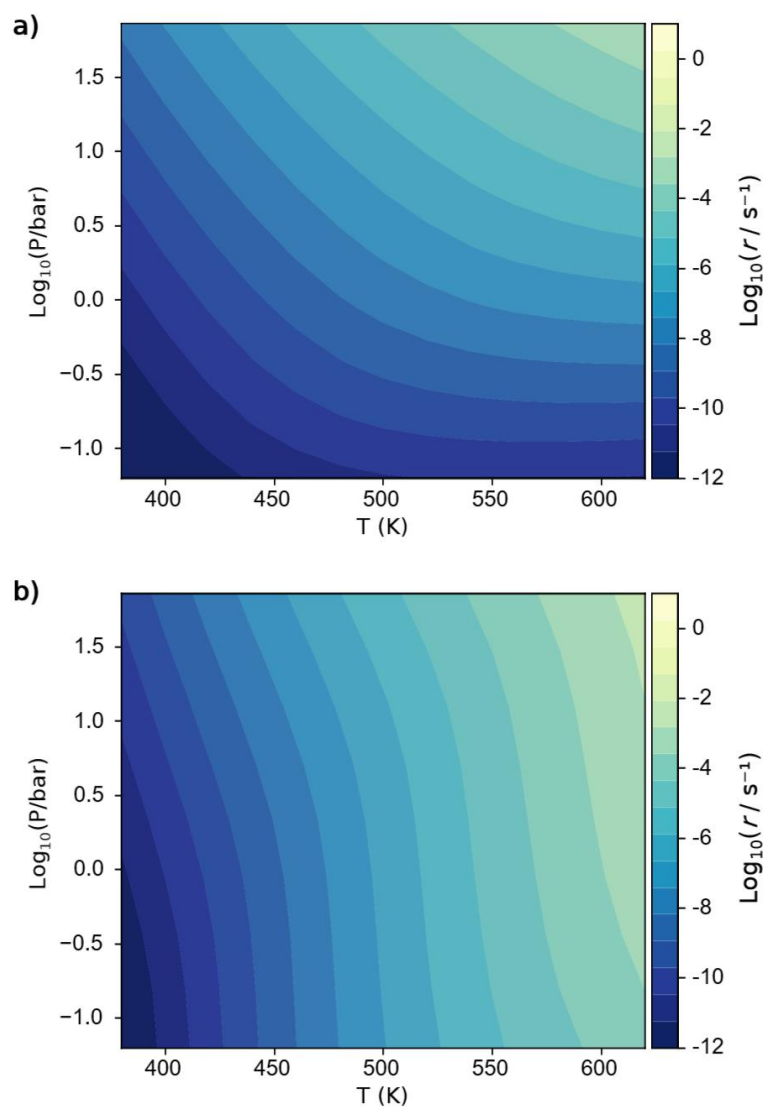

**Fig. S6.** Two-dimensional reaction rate maps for the formation of (a) methanol and (b) CO on the  $\text{Cu}_{11}\text{In}_9(551)$  surface as a function of temperature and pressure. Reaction rates are presented on a logarithmic ( $\log_{10}$ ) scale, as indicated by the color bar on the right.

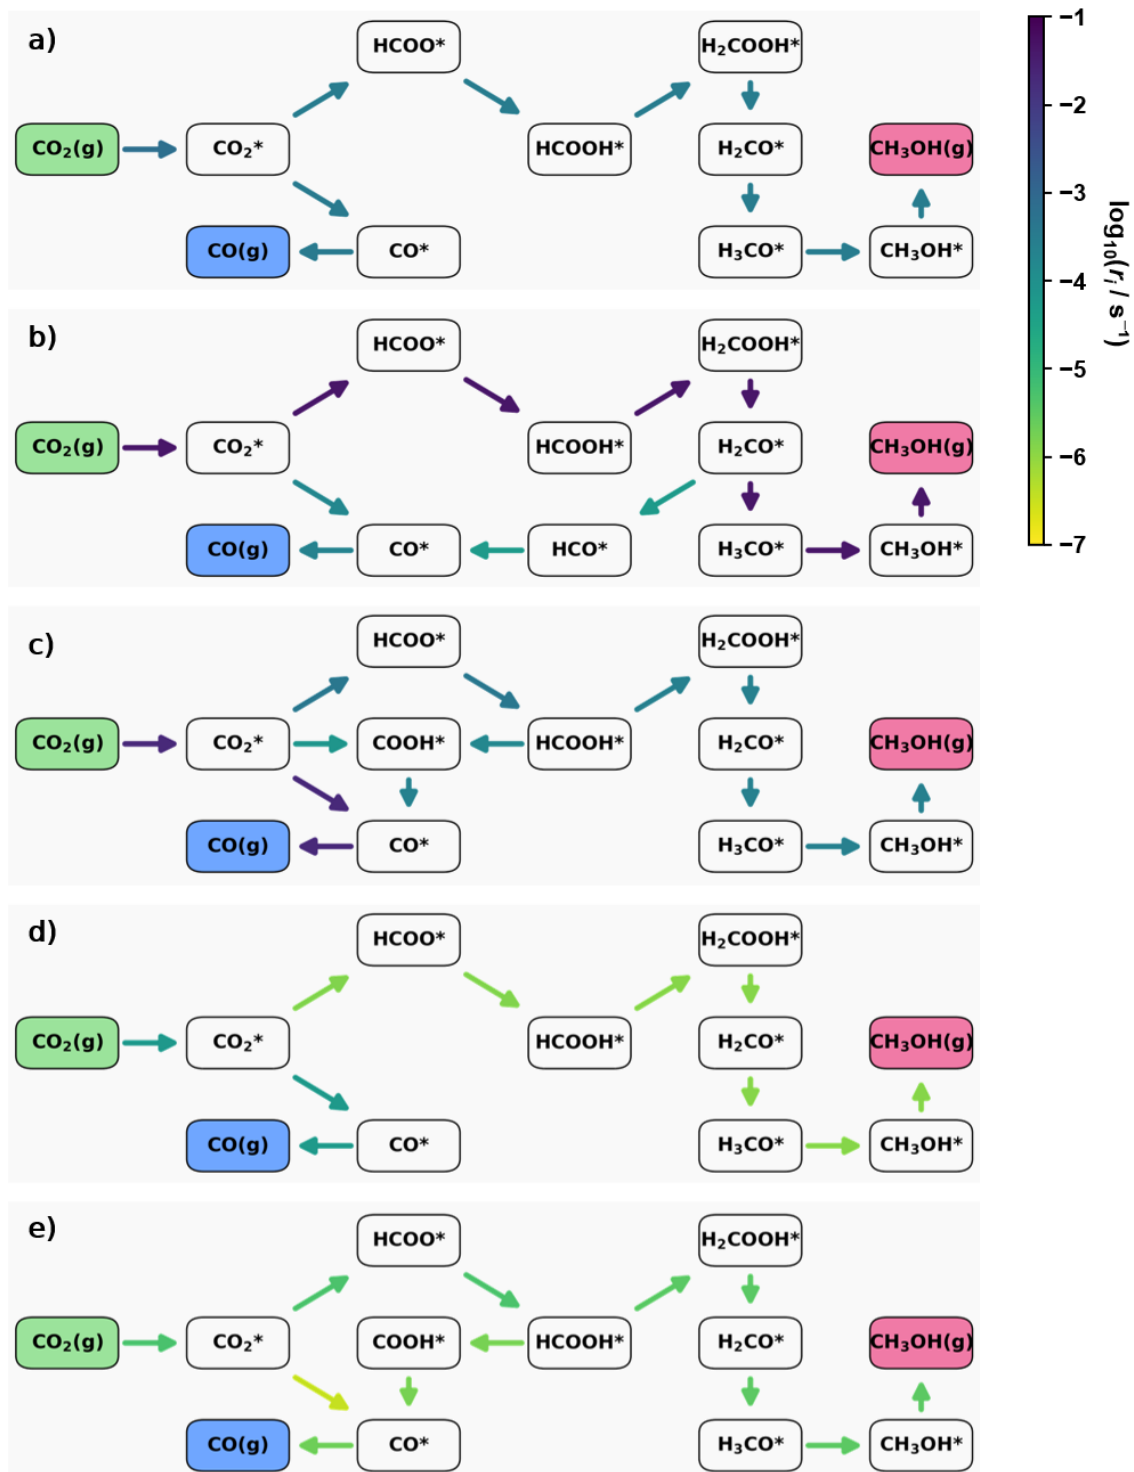

**Fig. S7.** Dominant reaction pathway diagrams on (a)  $\text{Cu}_2\text{In}(110)$ , (b)  $\text{Cu}_7\text{In}_3(040)\text{-a}$ , (c)  $\text{Cu}_7\text{In}_3(040)\text{-b}$ , (d)  $\text{Cu}_{11}\text{In}_9(020)$ , and (e)  $\text{Cu}_{11}\text{In}_9(551)$  at 500 K under partial pressures of 22.5 bar  $\text{H}_2$  and 7.5 bar  $\text{CO}_2$ . Arrow shading reflects the reaction rate of each elementary step, with darker arrows indicating faster rates. For clarity, steps with the lowest absolute or relative rates on each surface have been omitted.

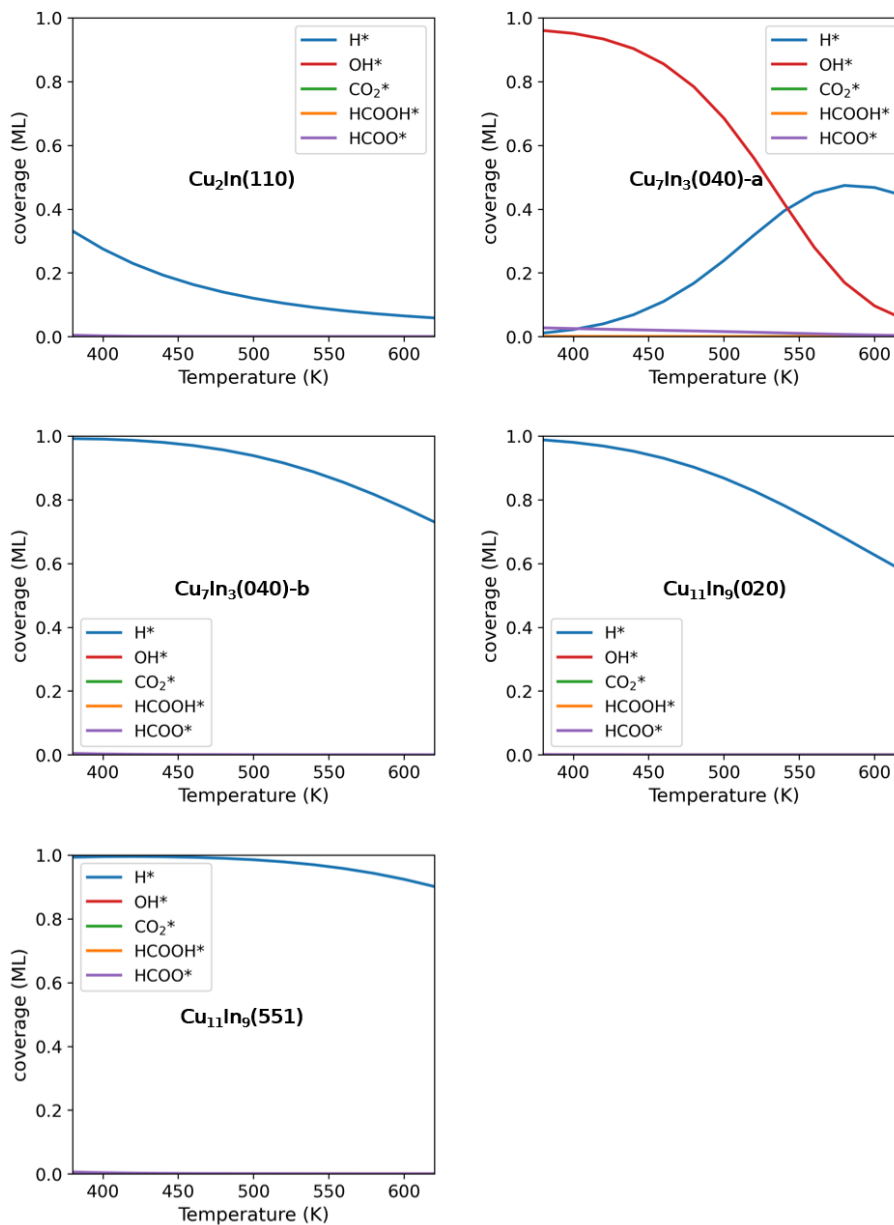

**Fig. S8.** Calculated steady-state coverages of the major adsorbed species ( $\text{H}^*$ ,  $\text{OH}^*$ ,  $\text{CO}_2^*$ ,  $\text{HCOOH}^*$ , and  $\text{HCOO}^*$ ) on the  $\text{Cu}_2\text{In}(110)$ ,  $\text{Cu}_7\text{In}_3(040)\text{-a}$ ,  $\text{Cu}_7\text{In}_3(040)\text{-b}$ ,  $\text{Cu}_{11}\text{In}_9(020)$ , and  $\text{Cu}_{11}\text{In}_9(551)$  under reaction conditions with  $\text{H}_2$  and  $\text{CO}_2$  partial pressures of 22.5 and 7.5 bar, respectively.

**Table S1.** The net reaction rate ( $r_i$ ) of elementary reaction steps from microkinetic modeling for CO<sub>2</sub> activation on various Cu–In alloy surfaces at 500 K and 30 bar. Columns (a–e) correspond to Cu<sub>2</sub>In(110), Cu<sub>7</sub>In<sub>3</sub>(040)-a, Cu<sub>7</sub>In<sub>3</sub>(040)-b, Cu<sub>11</sub>In<sub>9</sub>(020), and Cu<sub>11</sub>In<sub>9</sub>(551), respectively.

| step $i$                                                      | a         | b         | c         | d         | e         |
|---------------------------------------------------------------|-----------|-----------|-----------|-----------|-----------|
| <b>R1</b> CO <sub>2</sub> (g) + * → CO <sub>2</sub> *         | 6.77E-04  | 4.49E-02  | 2.06E-02  | 6.16E-05  | 5.41E-06  |
| <b>R2</b> H <sub>2</sub> (g) + 2* → 2H*                       | 9.74E-04  | 1.34E-01  | 1.03E-02  | 2.19E-05  | 1.19E-05  |
| <b>R3</b> CO <sub>2</sub> * + H* → HCOO* + *                  | 3.27E-04  | 4.48E-02  | 4.24E-04  | 1.39E-06  | 5.07E-06  |
| <b>R4</b> HCOO* + H* → H <sub>2</sub> COO* + *                | 2.67E-07  | 1.96E-13  | 5.37E-10  | 7.17E-10  | 5.03E-10  |
| <b>R5</b> HCOO* + H* → HCOOH* + *                             | 3.26E-04  | 4.48E-02  | 4.24E-04  | 1.38E-06  | 5.07E-06  |
| <b>R6</b> H <sub>2</sub> COO* + H* → H <sub>2</sub> COOH* + * | 2.67E-07  | 1.96E-13  | 5.37E-10  | 7.17E-10  | 5.03E-10  |
| <b>R7</b> HCOOH* + H* → H <sub>2</sub> COOH* + *              | 3.23E-04  | 4.48E-02  | 2.56E-04  | 1.26E-06  | 3.37E-06  |
| <b>R8</b> HCOOH* + * → HCO* + OH*                             | 9.94E-10  | 1.73E-08  | 1.02E-10  | 1.87E-11  | 6.05E-11  |
| <b>R9</b> H <sub>2</sub> COOH* + * → H <sub>2</sub> CO* + OH* | 3.24E-04  | 4.48E-02  | 2.56E-04  | 1.26E-06  | 3.37E-06  |
| <b>R10</b> HCO* + H* → H <sub>2</sub> CO* + *                 | -2.65E-08 | -5.80E-05 | -1.57E-07 | -4.53E-09 | -4.56E-08 |
| <b>R11</b> H <sub>2</sub> CO* + H* → H <sub>3</sub> CO* + *   | 3.24E-04  | 4.47E-02  | 2.56E-04  | 1.25E-06  | 3.32E-06  |
| <b>R12</b> OH* + H* → H <sub>2</sub> O* + *                   | 6.77E-04  | 4.49E-02  | 2.06E-02  | 6.16E-05  | 5.41E-06  |
| <b>R13</b> H <sub>3</sub> CO* + H* → CH <sub>3</sub> OH* + *  | 3.24E-04  | 4.47E-02  | 2.56E-04  | 1.25E-06  | 3.32E-06  |
| <b>R14</b> CO <sub>2</sub> * + H* → COOH* + *                 | 3.72E-09  | 7.08E-07  | 7.55E-05  | 2.90E-07  | 1.54E-08  |
| <b>R15</b> CO <sub>2</sub> * + * → CO* + O*                   | 3.50E-04  | 1.69E-04  | 2.01E-02  | 5.99E-05  | 3.30E-07  |
| <b>R16</b> COOH* + * → CO* + OH*                              | 2.94E-06  | 4.86E-06  | 2.44E-04  | 4.18E-07  | 1.72E-06  |
| <b>R17</b> CO* + H* → HCO* + *                                | -2.75E-08 | -5.80E-05 | -1.57E-07 | -4.55E-09 | -4.57E-08 |
| <b>R18</b> CO* → CO(g) + *                                    | 3.53E-04  | 2.31E-04  | 2.03E-02  | 6.03E-05  | 2.09E-06  |
| <b>R19</b> O* + H* → OH* + *                                  | 5.16E-08  | -6.77E-10 | 9.29E-03  | 1.77E-05  | 1.51E-07  |
| <b>R20</b> CH <sub>3</sub> OH* → CH <sub>3</sub> OH(g) + *    | 3.24E-04  | 4.47E-02  | 2.56E-04  | 1.25E-06  | 3.32E-06  |
| <b>R21</b> H <sub>2</sub> O* → H <sub>2</sub> O(g) + *        | 6.77E-04  | 4.49E-02  | 2.06E-02  | 6.16E-05  | 5.41E-06  |
| <b>R22</b> COOH* + H* → HCOOH* + *                            | -2.94E-06 | -4.15E-06 | -1.68E-04 | -1.28E-07 | -1.70E-06 |
| <b>R23</b> H <sub>2</sub> (g) + O* + * → OH* + H*             | 3.50E-04  | 1.69E-04  | 1.08E-02  | 4.22E-05  | 1.79E-07  |

**Note:** The net rates of the H<sub>2</sub>COO\*-involving steps, including **R4** (HCOO\* + H\* → H<sub>2</sub>COO\* + \*) and **R6** (H<sub>2</sub>COO\* + H\* → H<sub>2</sub>COOH\* + \*), are several orders of magnitude lower than those of the dominant HCOO\* + H\* → HCOOH\* + \* (**R5**) hydrogenation route on all investigated surfaces. Therefore, the H<sub>2</sub>COO\* pathway was excluded from the dominant reaction mechanism.

**Table S2.** Preferred adsorption sites and the corresponding Gibbs free energies and enthalpies of adsorption [in brackets] for CO<sub>2</sub>, H, CO, H<sub>2</sub>O, and MeOH at 500 K under reaction conditions of 7.5 bar CO<sub>2</sub>, 22.5 bar H<sub>2</sub>, and 1 bar each of CO, H<sub>2</sub>O, and MeOH. For clarity, only top-layer atoms are shown on all surfaces. The orange, brown, red, gray, and white spheres represent Cu atom, In atom, O atom, C atom, and H atom, respectively.

|                                            | CO <sub>2</sub>                                                                                      | H                                                                                                    | CO                                                                                                   | H <sub>2</sub> O                                                                                       | MeOH                                                                                                   |
|--------------------------------------------|------------------------------------------------------------------------------------------------------|------------------------------------------------------------------------------------------------------|------------------------------------------------------------------------------------------------------|--------------------------------------------------------------------------------------------------------|--------------------------------------------------------------------------------------------------------|
| <b>Cu<sub>2</sub>In(110)</b>               | 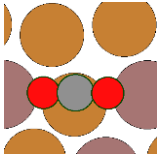<br>+0.51 [-0.23]   | <br>+0.09 [-0.16]   | <br>+0.21 [-0.53]   | <br>+0.39 [-0.25]   | <br>+0.28 [-0.36]   |
| <b>Cu<sub>7</sub>In<sub>3</sub>(040)-a</b> | <br>+0.22 [-0.35]   | <br>-0.06 [-0.34]   | <br>-0.17 [-0.75]   | <br>-0.07 [-0.59]   | <br>+0.03 [-0.72]   |
| <b>Cu<sub>7</sub>In<sub>3</sub>(040)-b</b> | <br>+0.35 [-0.23] | <br>-0.12 [-0.38] | <br>-0.23 [-0.80] | <br>-0.04 [-0.67] | <br>-0.13 [-0.85] |
| <b>Cu<sub>11</sub>In<sub>9</sub>(020)</b>  | <br>+0.35 [-0.29] | <br>-0.08 [-0.35] | <br>-0.14 [-0.71] | <br>+0.38 [-0.23] | <br>+0.25 [-0.44] |
| <b>Cu<sub>11</sub>In<sub>9</sub>(551)</b>  | <br>+0.47 [-0.25] | <br>-0.18 [-0.46] | <br>+0.01 [-0.75] | <br>+0.30 [-0.33] | <br>+0.29 [-0.44] |

**Note:**

At 500 K, CO<sub>2</sub> adsorption is thermodynamically unfavorable on all investigated Cu–In surfaces, whereas H\* adsorption is comparatively strong on all surfaces except Cu<sub>2</sub>In(110). Adsorption of MeOH and H<sub>2</sub>O is also generally unfavorable, indicating facile product desorption under reaction conditions. The anomalous behavior observed on Cu<sub>2</sub>In(110) can be attributed to pronounced surface reconstruction effects (Fig. S1). Specifically, the In–In distance decreases from 3.67 to 3.21 Å. Along the

–In–Cu–In–Cu– chain oriented along the  $a$  direction of the surface unit cell, the Cu–In bond lengths are elongated from 2.65 to 2.80 Å; the two Cu<sub>4</sub> linear chains become distorted and no longer maintain a coplanar 180° configuration, while the In–Cu–In angle between adjacent Cu<sub>4</sub> chains decreases from 90° to 70°.

**Table S3.** Degree of kinetic rate control ( $X_{RC,i}$ ) for some important elementary reaction steps ( $|X_{RC,i}| > 0.1$ ) involved in the formation of MeOH, CO, and H<sub>2</sub>O from CO<sub>2</sub> activation on the Cu<sub>2</sub>In(110).

| adsorbed species | $X_{RC,i}$ |       |                  |
|------------------|------------|-------|------------------|
|                  | MeOH       | CO    | H <sub>2</sub> O |
| H*               | -0.25      | -0.24 | -0.24            |
| CO-O*            | 0.00       | 0.99  | 0.52             |
| H-HCOOH*         | 0.99       | 0.00  | 0.48             |

**Table S4.** Degree of kinetic rate control ( $X_{RC,i}$ ) for some important elementary reaction steps ( $|X_{RC,i}| > 0.1$ ) involved in the formation of MeOH, CO, and H<sub>2</sub>O from CO<sub>2</sub> activation on the Cu<sub>7</sub>In<sub>3</sub>(040)-a.

| adsorbed species     | $X_{RC,i}$ |       |                  |
|----------------------|------------|-------|------------------|
|                      | MeOH       | CO    | H <sub>2</sub> O |
| H*                   | -0.46      | -0.46 | -0.46            |
| OH*                  | -1.35      | -1.36 | -1.35            |
| CO-O*                | 0.00       | 0.73  | 0.00             |
| H-H <sub>2</sub> CO* | -0.15      | -0.72 | -0.15            |
| H-HCOOH*             | 0.00       | -0.16 | -0.09            |
| H-HCO*               | 0.00       | 0.25  | 0.00             |
| H-OH*                | 1.23       | 0.91  | 1.23             |

**Table S5.** Degree of kinetic rate control ( $X_{RC,i}$ ) for some important elementary reaction steps ( $|X_{RC,i}| > 0.1$ ) involved in the formation of MeOH, CO, and H<sub>2</sub>O from CO<sub>2</sub> activation on the Cu<sub>7</sub>In<sub>3</sub>(040)-b.

| adsorbed species | $X_{RC,i}$ |       |                  |
|------------------|------------|-------|------------------|
|                  | MeOH       | CO    | H <sub>2</sub> O |
| H*               | -1.91      | -1.88 | -1.88            |
| CO-O*            | 0.00       | 0.99  | 0.98             |
| H-HCOOH*         | 0.99       | 0.00  | 0.00             |

**Table S6.** Degree of kinetic rate control ( $X_{RC,i}$ ) for some important elementary reaction steps ( $|X_{RC,i}| > 0.1$ ) involved in the formation of MeOH, CO, and H<sub>2</sub>O from CO<sub>2</sub> activation on the Cu<sub>11</sub>In<sub>9</sub>(020).

| adsorbed species | $X_{RC,i}$ |       |                  |
|------------------|------------|-------|------------------|
|                  | MeOH       | CO    | H <sub>2</sub> O |
| H*               | -1.76      | -1.73 | -1.73            |
| CO-O*            | 0.00       | 0.99  | 0.97             |
| H-HCOOH*         | 0.99       | 0.00  | 0.00             |

**Table S7.** Degree of kinetic rate control ( $X_{RC,i}$ ) for some important elementary reaction steps ( $|X_{RC,i}| > 0.1$ ) involved in the formation of MeOH, CO, and H<sub>2</sub>O from CO<sub>2</sub> activation on the Cu<sub>11</sub>In<sub>9</sub>(551).

| adsorbed species      | $X_{RC,i}$ |       |                  |
|-----------------------|------------|-------|------------------|
|                       | MeOH       | CO    | H <sub>2</sub> O |
| H*                    | -1.97      | -1.97 | -1.97            |
| CO-O*                 | 0.00       | 0.16  | 0.00             |
| H-COOH*               | 0.00       | 0.81  | 0.31             |
| H-HCOOH*              | 0.79       | 0.00  | 0.49             |
| H <sub>2</sub> CO-OH* | 0.21       | 0.00  | 0.13             |

**Note:** The  $X_{RC}$  values for H<sub>2</sub>O formation are reported for completeness because H<sub>2</sub>O is a co-product of both methanol synthesis and CO formation pathways. These values help identify the role of OH\* and H<sub>2</sub>O\* species in the overall reaction network, although the main discussion focuses on the formation of the target products, CH<sub>3</sub>OH and CO.

### 3. Free-energy profiles and representative structures

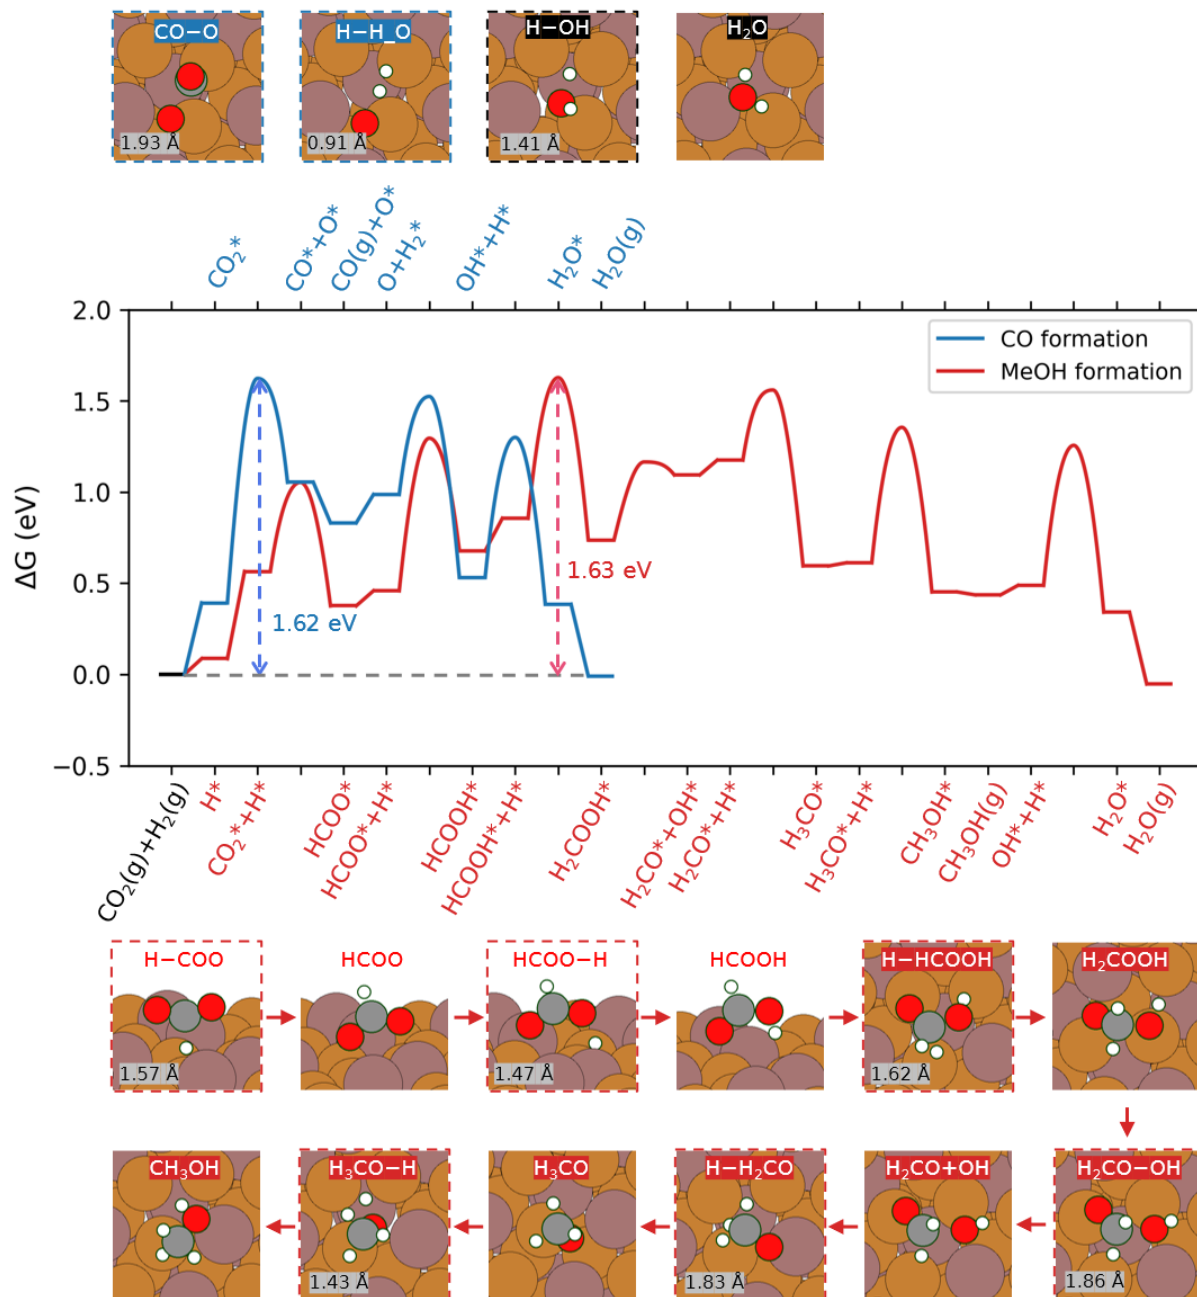

**Fig. S9.** Gibbs free energy diagram and optimized structures of reaction intermediates and transition states for methanol and CO formation on Cu<sub>2</sub>In(110) at 500 K under reaction conditions of 22.5 bar H<sub>2</sub>, 7.5 bar CO<sub>2</sub>, and 1 bar each of CO, H<sub>2</sub>O, and MeOH. Orange, brown, red, gray, and white spheres denote Cu, In, O, C, and H atoms, respectively; transition-state structures are outlined by dashed boxes.

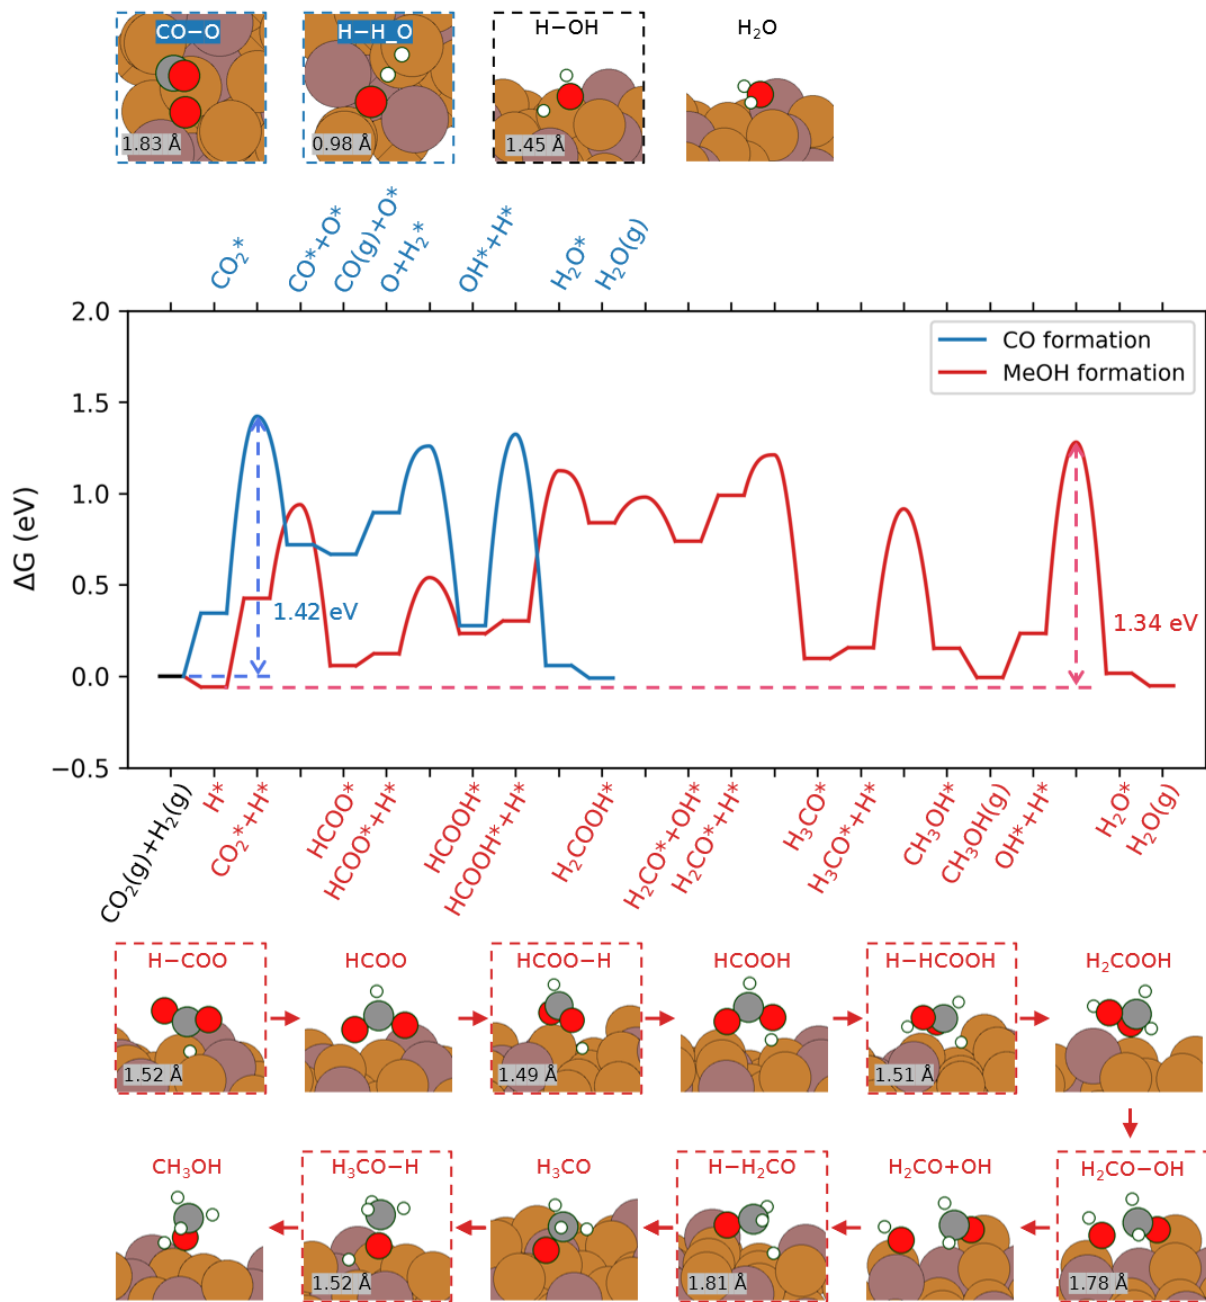

**Fig. S10.** Gibbs free energy diagram and optimized structures of reaction intermediates and transition states for methanol and CO formation on Cu<sub>7</sub>In<sub>3</sub>(040)-a at 500 K under reaction conditions of 22.5 bar H<sub>2</sub>, 7.5 bar CO<sub>2</sub>, and 1 bar each of CO, H<sub>2</sub>O, and MeOH. Orange, brown, red, gray, and white spheres denote Cu, In, O, C, and H atoms, respectively; transition-state structures are outlined by dashed boxes.

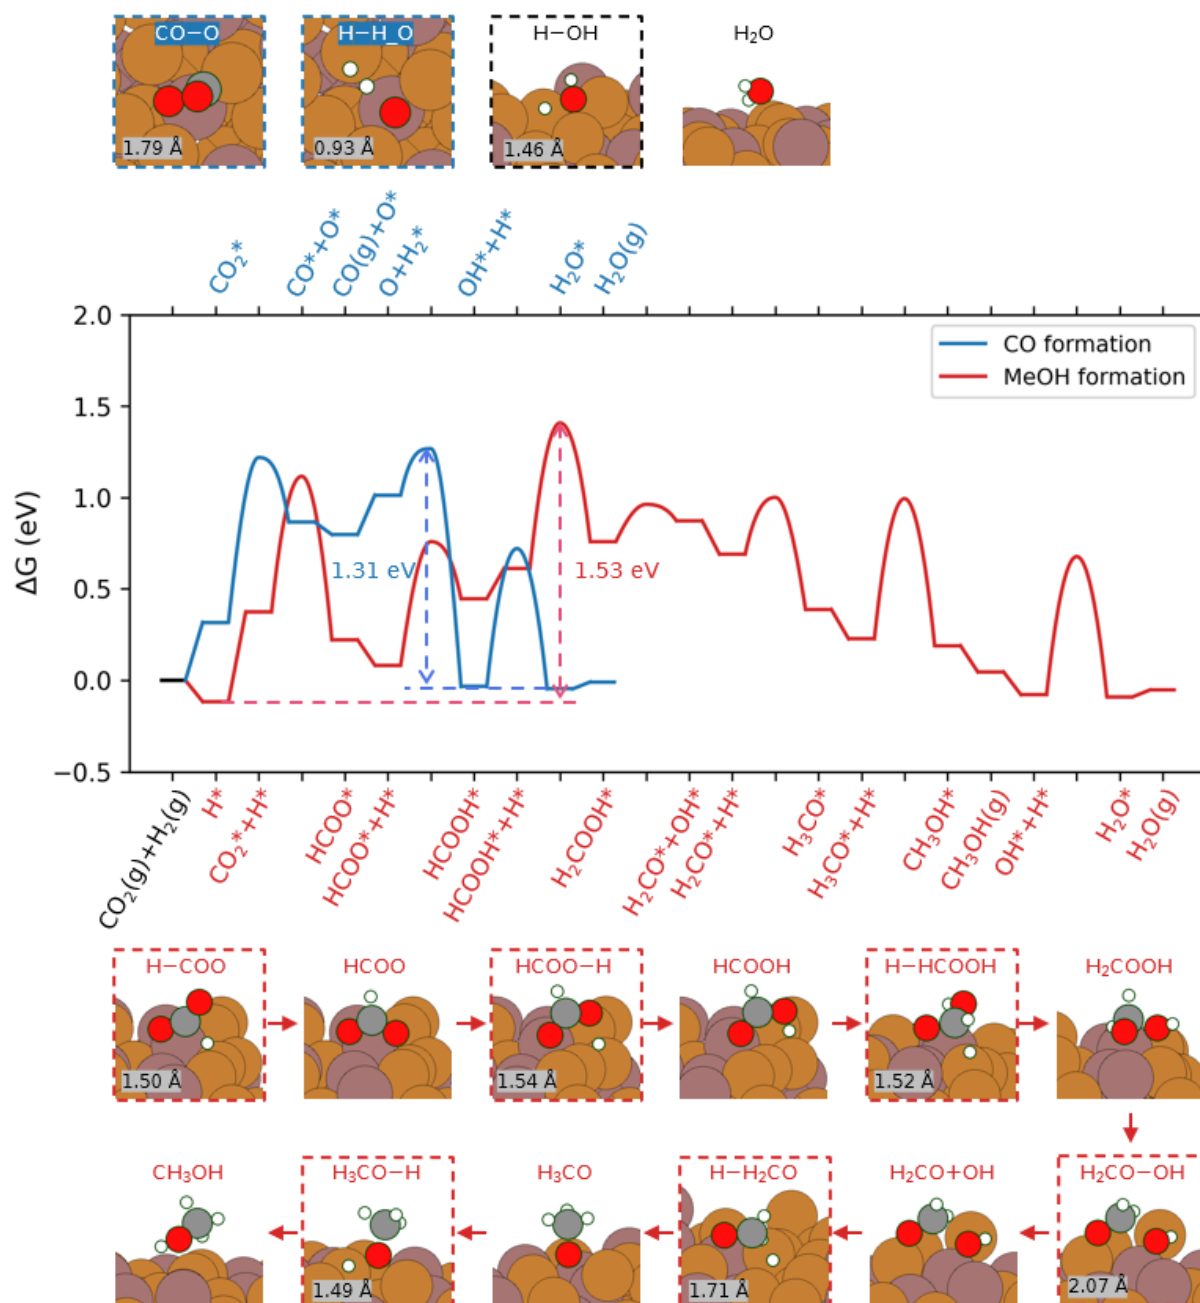

**Fig. S11.** Gibbs free energy diagram and optimized structures of reaction intermediates and transition states for methanol and CO formation on  $\text{Cu}_7\text{In}_3(040)\text{-b}$  at 500 K under reaction conditions of 22.5 bar  $\text{H}_2$ , 7.5 bar  $\text{CO}_2$ , and 1 bar each of  $\text{CO}$ ,  $\text{H}_2\text{O}$ , and  $\text{MeOH}$ . Orange, brown, red, gray, and white spheres denote Cu, In, O, C, and H atoms, respectively; transition-state structures are outlined by dashed boxes.

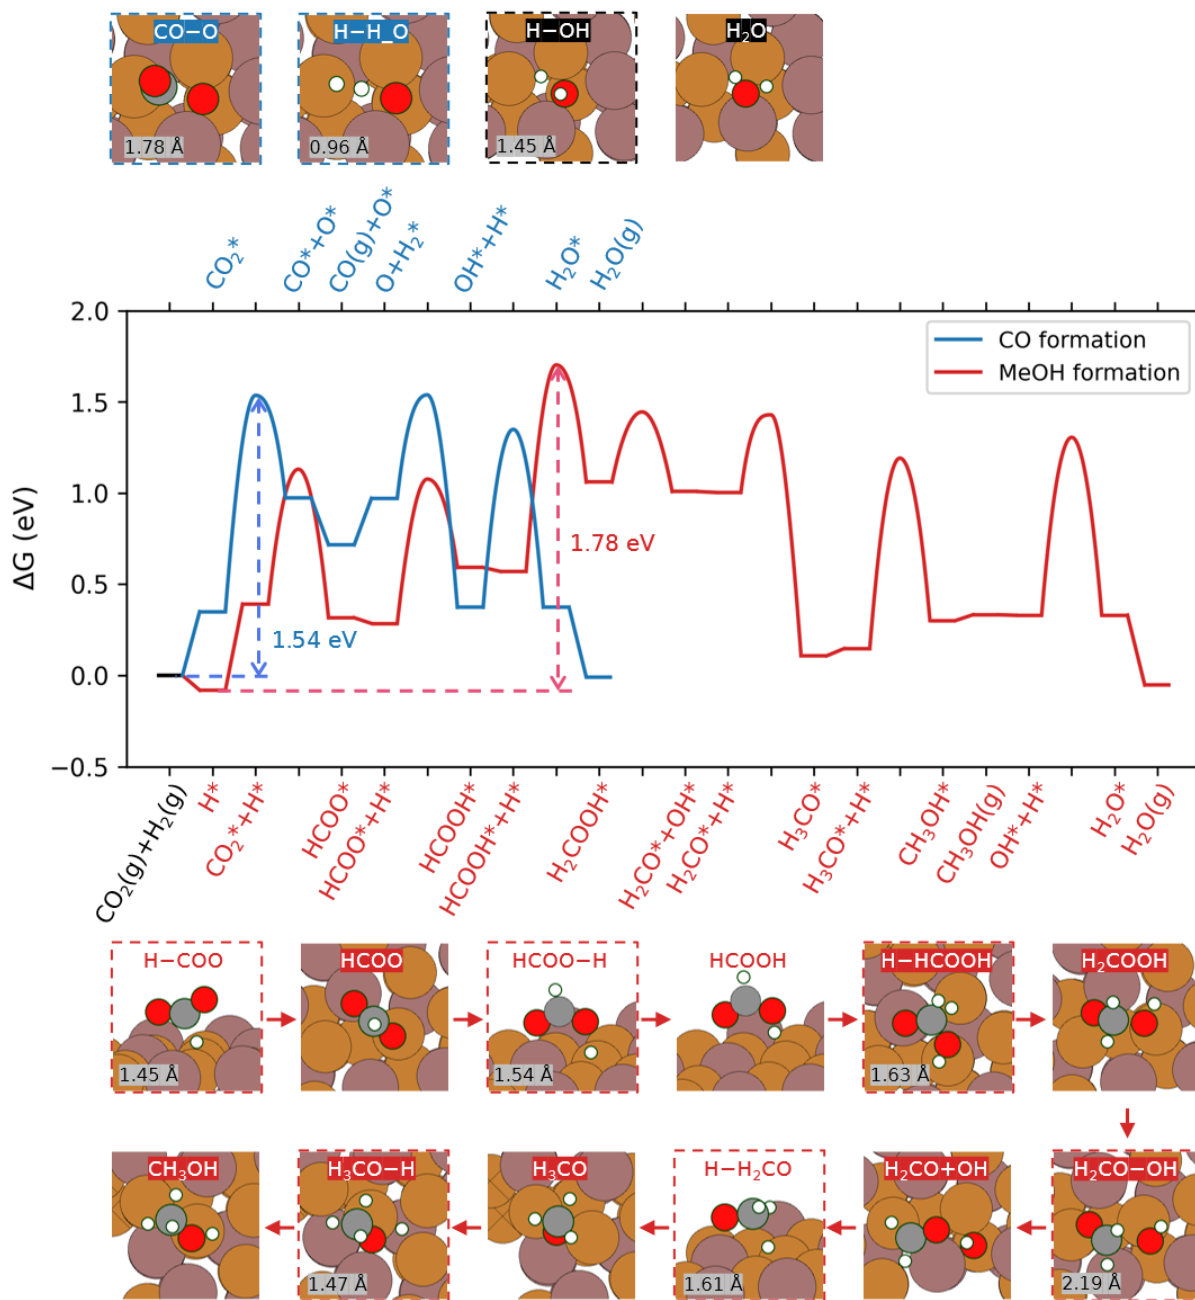

**Fig. S12.** Gibbs free energy diagram and optimized structures of reaction intermediates and transition states for methanol and CO formation on  $\text{Cu}_{11}\text{In}_9(020)$  at 500 K under reaction conditions of 22.5 bar  $\text{H}_2$ , 7.5 bar  $\text{CO}_2$ , and 1 bar each of CO,  $\text{H}_2\text{O}$ , and MeOH. Orange, brown, red, gray, and white spheres denote Cu, In, O, C, and H atoms, respectively; transition-state structures are outlined by dashed boxes.

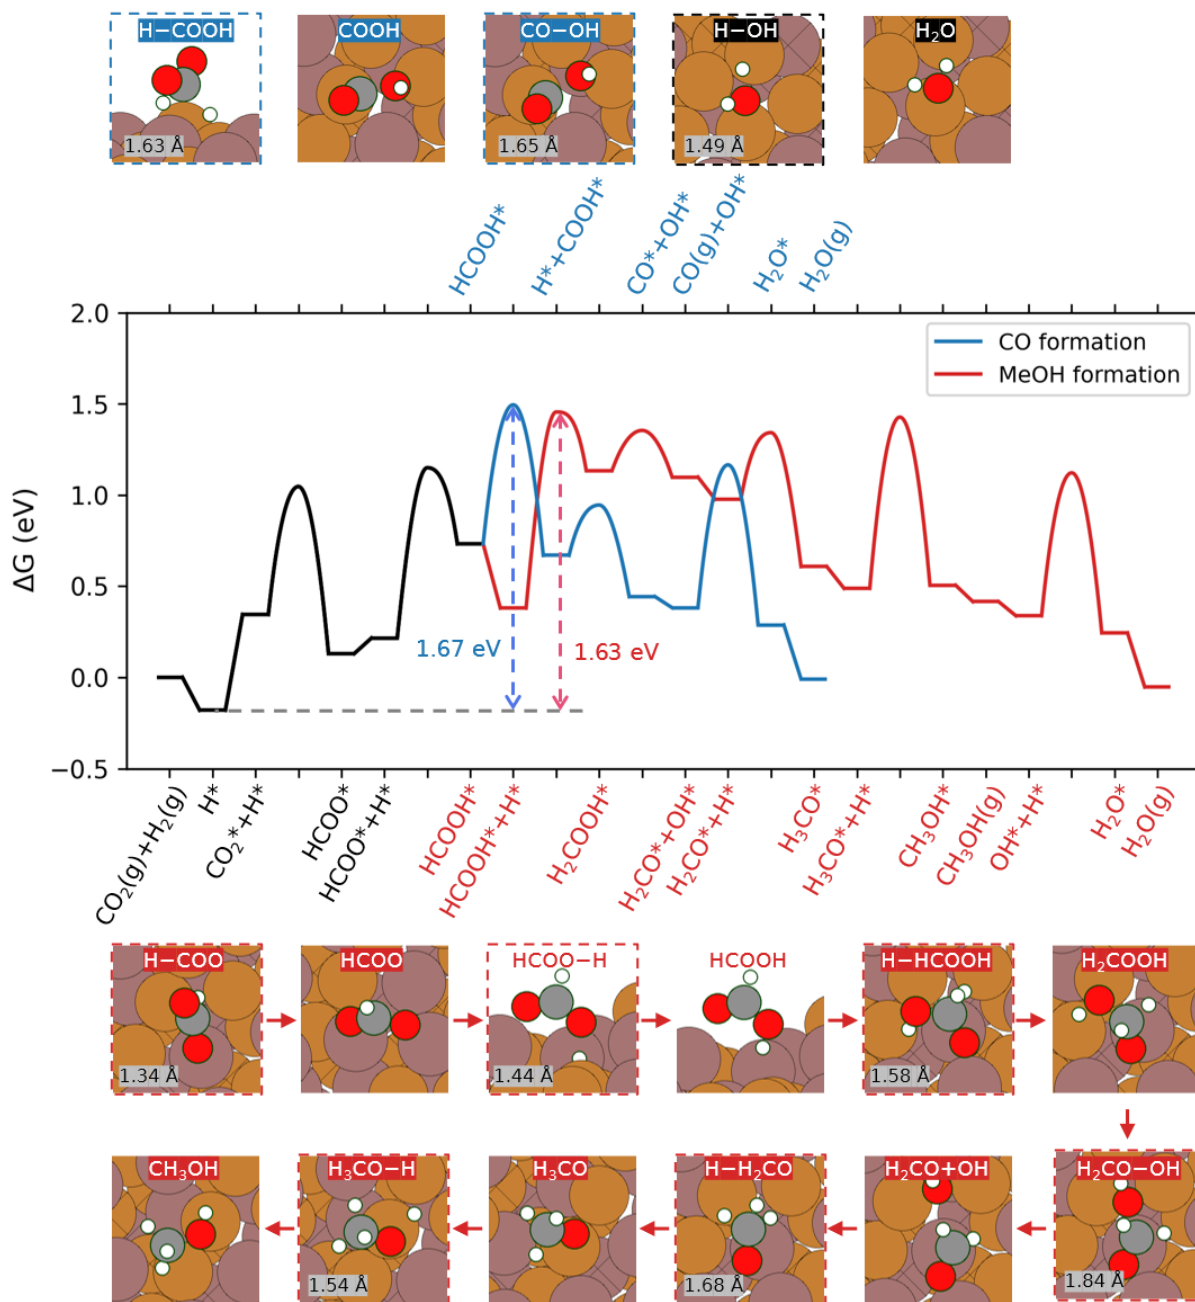

**Fig. S13.** Gibbs free energy diagram and optimized structures of reaction intermediates and transition states for methanol and CO formation on Cu<sub>11</sub>In<sub>9</sub>(551) at 500 K under reaction conditions of 22.5 bar H<sub>2</sub>, 7.5 bar CO<sub>2</sub>, and 1 bar each of CO, H<sub>2</sub>O, and MeOH. Orange, brown, red, gray, and white spheres denote Cu, In, O, C, and H atoms, respectively; transition-state structures are outlined by dashed boxes.

#### 4. Activity descriptors and free energies of formation

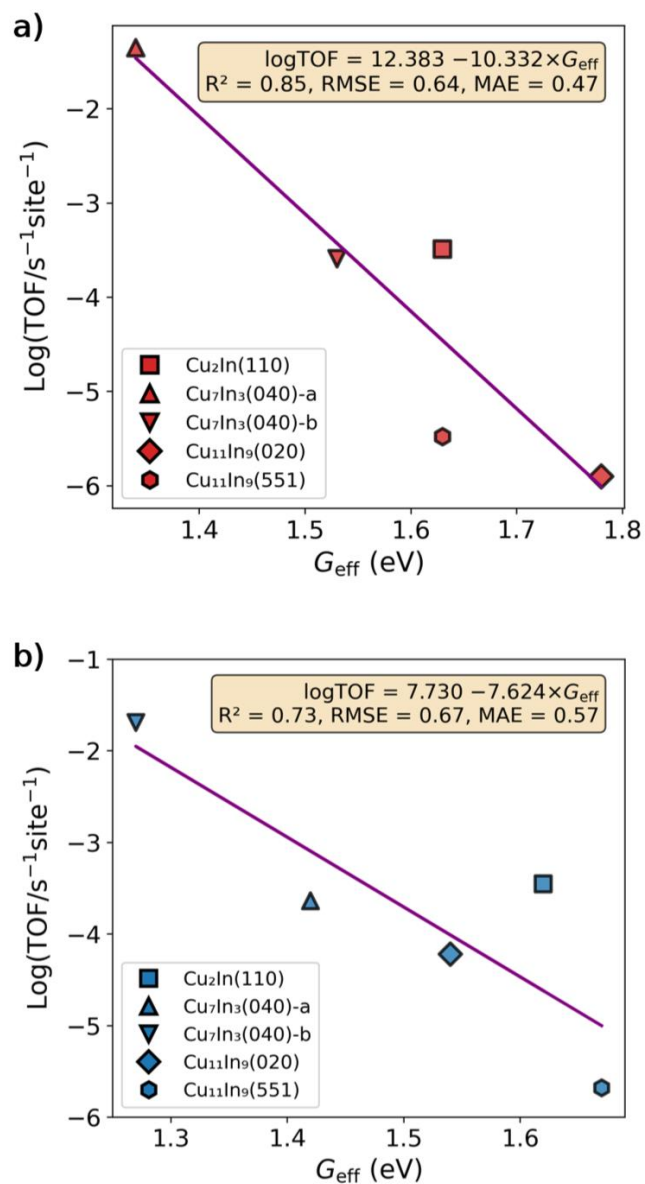

**Fig. S14.** Correlation between the logarithm of the reaction rates and the conventional PES-based effective barrier ( $G_{\text{eff}}$ ) for methanol (a) and CO (b) formation across five Cu-In surfaces at 500 K.

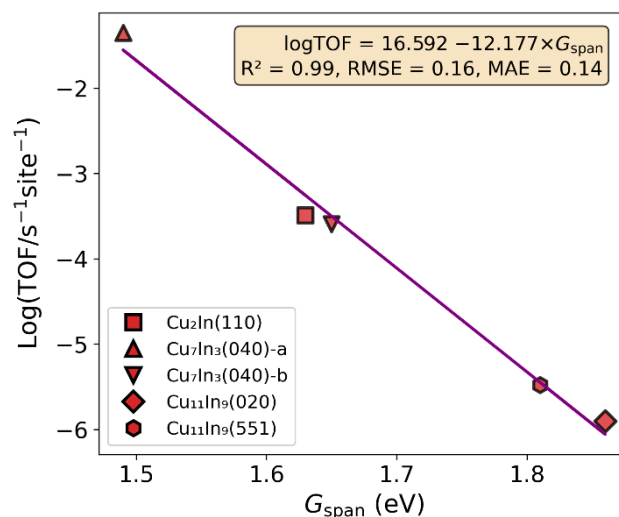

**Fig. S15.** Correlation between the logarithm of the reaction rates and the TDI-corrected energetic span ( $G_{\text{span}}$ ) for methanol formation across five Cu–In surfaces at 500 K.

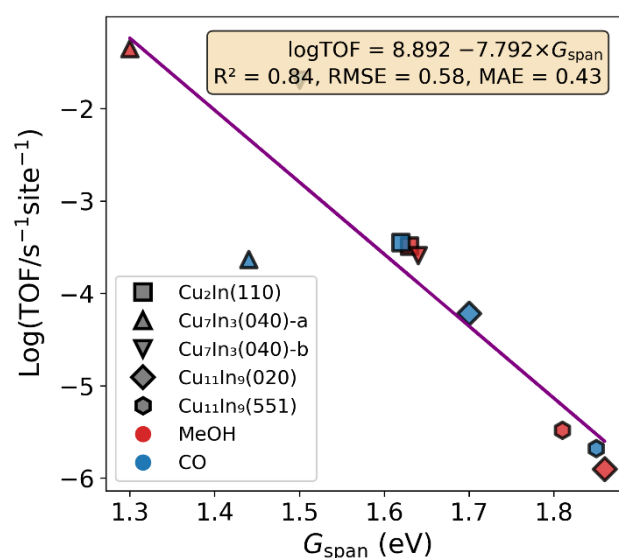

**Fig. S16.** Correlation between the logarithm of the reaction rates and  $G_{\text{span}}$  values recalculated using MKM-derived dominant surface species as the thermodynamic baseline across five Cu–In surfaces at 500 K.

**Note:** For  $\text{Cu}_7\text{In}_3(040)\text{-a}$  at 500 K,  $\text{OH}^*$  was used as the baseline according to the steady-state coverage and DRC analysis, while the dominant surface species identified from MKM were used for the remaining surfaces. The resulting correlation ( $R^2 = 0.84$ ) is weaker than that obtained using the PES-based  $G_{\text{span}}$  values, indicating that the dominant steady-state surface species from MKM cannot be directly substituted for the PES-derived thermodynamic baseline in this simplified energetic span descriptor.

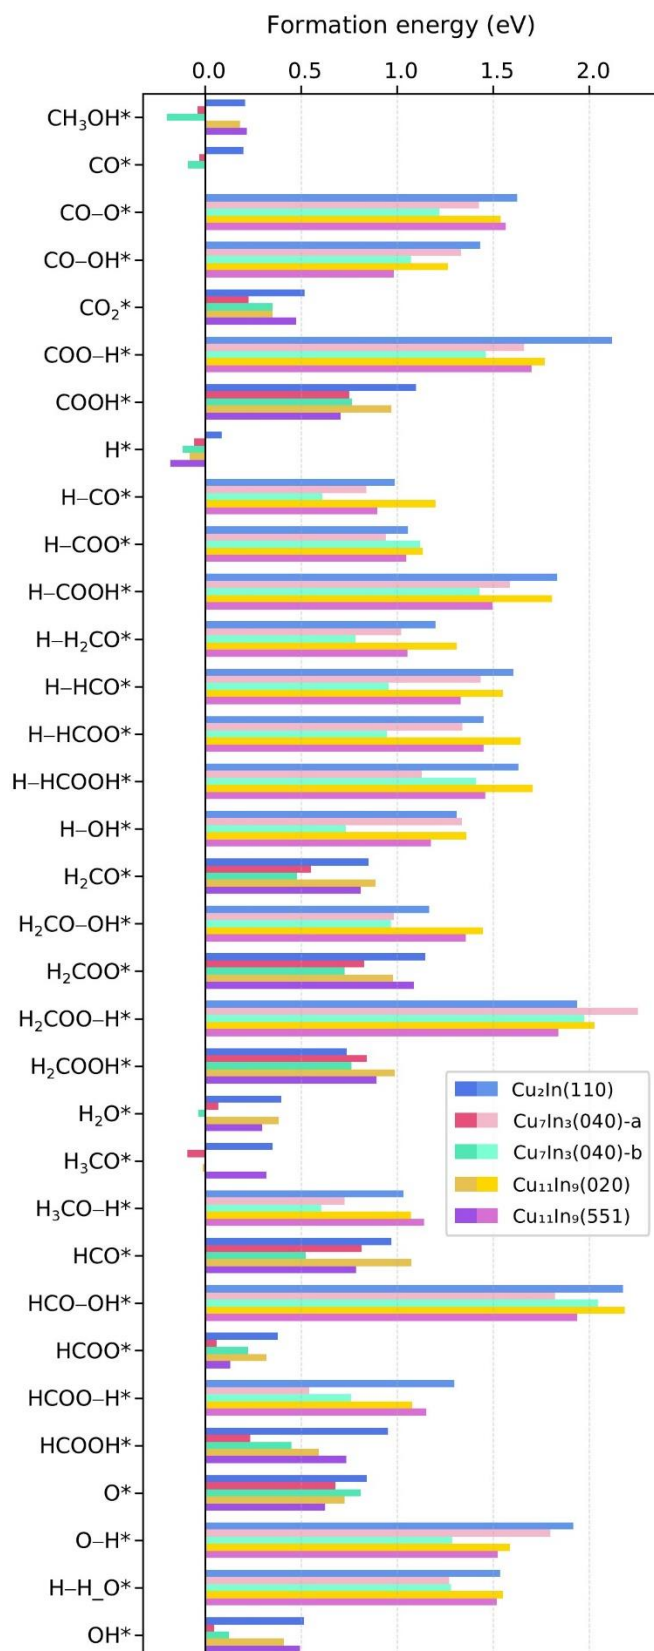

**Fig. S17.** Relative Gibbs free energies of formation of surface intermediates and transition states at 500 K, evaluated with respect to the gas-phase chemical potentials ( $H_2$ ,  $CO_2$ ,  $H_2O$ ) under reaction conditions with partial pressures of 22.5 bar  $H_2$ , 7.5 bar  $CO_2$ , and 1 bar each of  $CO$ ,  $H_2O$ , and  $MeOH$ . Dark-colored bars denote intermediates, while light-colored bars represent transition states.

**Note:**

For a general surface species  $C_aH_bO_c^*$ , where  $a$ ,  $b$ , and  $c$  are the numbers of C, H, and O atoms, respectively, the Gibbs free energy of formation is given by:

$$\Delta G_{\text{form}}(C_aH_bO_c^*) = G(C_aH_bO_c^*) - G(\text{slab}) - aR_C - bR_H - cR_O$$

The elemental reference energies are defined as:

$$R_H = \frac{1}{2}\mu_{H_2}$$

$$R_O = \mu_{H_2O} - \mu_{H_2}$$

$$R_C = \mu_{CO_2} - 2R_O = \mu_{CO_2} - 2\mu_{H_2O} + 2\mu_{H_2}$$

where  $\mu_{H_2}$ ,  $\mu_{H_2O}$ , and  $\mu_{CO_2}$  correspond to the chemical potentials of gas-phase  $H_2$ ,  $H_2O$ , and  $CO_2$ , respectively, under the specified reaction conditions.

Expanding the elemental reference energies gives:

$$\Delta G_{\text{form}}(C_aH_bO_c^*) = G(C_aH_bO_c^*) - G(\text{slab}) - a\mu_{CO_2} + (2a - c)\mu_{H_2O} - \left(2a + \frac{b}{2} - c\right)\mu_{H_2}$$

This expression shows that the explicit contribution from  $\mu_{H_2O}$  depends on the stoichiometric coefficient  $(2a - c)$ , rather than affecting all oxygen-containing species equally.

For example, for  $HCOO^*$ , where  $a = 1$ ,  $b = 1$ , and  $c = 2$ , the Gibbs free energy of formation is:

$$\Delta G_{\text{form}}(HCOO^*) = G(HCOO^*) - G(\text{slab}) - R_C - R_H - 2R_O$$

which can be expanded as:

$$\Delta G_{\text{form}}(HCOO^*) = G(HCOO^*) - G(\text{slab}) - \mu_{CO_2} - \frac{1}{2}\mu_{H_2}$$

Therefore, the  $\mu_{H_2O}$  term is cancelled for  $HCOO^*$ . The same cancellation applies to other COO-containing intermediates, such as  $H_2COO^*$ ,  $HCOOH^*$ , and  $H_2COOH^*$ . In contrast, more reduced oxygen-containing species, such as  $CO^*$ ,  $HCO^*$ ,  $H_2CO^*$ ,  $H_3CO^*$ ,  $CH_3OH^*$ ,  $OH^*$ , and  $H_2O^*$ , retain an explicit dependence on the selected oxygen reference and are therefore more sensitive to the thermodynamic contribution of  $H_2O$ .

For instance, the formation free energy of  $H_3CO^*$  can be expanded as:

$$\Delta G_{\text{form}}(H_3CO^*) = G(H_3CO^*) - G(\text{slab}) - \mu_{CO_2} + \mu_{H_2O} - \frac{5}{2}\mu_{H_2}$$

This explains why highly reduced oxygen-containing intermediates, such as  $H_3CO^*$ , can be more sensitive to the chosen oxygen reference than COO-containing species. The same procedure was applied to all other surface intermediates and transition states.

Alternative reference schemes were also examined as consistency checks. An  $O_2$ -based oxygen reference led to a strong systematic stabilization of nearly all surface intermediates and transition states, which is not representative of the  $H_2$ -rich  $CO_2$  hydrogenation environment considered here. A  $CH_4/H_2$ -based carbon reference was also tested, but it introduces a highly reduced carbon reservoir outside the

present CO<sub>2</sub>/H<sub>2</sub> reaction network and changes the TDTS assignment for Cu<sub>7</sub>In<sub>3</sub>(040)-a. Moreover, O<sub>2</sub> and CH<sub>4</sub> are not involved as reactant or product reservoirs in the present CO<sub>2</sub>/H<sub>2</sub> hydrogenation network, whereas the adopted H<sub>2</sub>O/H<sub>2</sub>-based reference uses species directly participating in the reaction system. Therefore, the H<sub>2</sub>O/H<sub>2</sub>-based oxygen reference was adopted because it is more consistent with the CO<sub>2</sub>/H<sub>2</sub>-based PES and descriptor framework used in this work.

**Table S8.** Summary of TDI/baseline assignments in MKM and descriptor analyses for methanol and CO formation at 500 K.

| Surface                                 | MKM-inferred TDI | $G_{\text{span}}$ baseline | $G_{\text{HL}}$ TDI |
|-----------------------------------------|------------------|----------------------------|---------------------|
| Cu <sub>2</sub> In(110)                 | H*               | Reference state            | Reference state     |
| Cu <sub>7</sub> In <sub>3</sub> (040)-a | OH*              | H*                         | H*                  |
| Cu <sub>7</sub> In <sub>3</sub> (040)-b | H*               | H*                         | H*                  |
| Cu <sub>11</sub> In <sub>9</sub> (020)  | H*               | H*                         | H*                  |
| Cu <sub>11</sub> In <sub>9</sub> (551)  | H*               | H*                         | H*                  |

**Note:** The MKM-inferred TDI was assigned based on steady-state coverages and DRC analysis. The  $G_{\text{span}}$  baseline denotes the thermodynamic reference adopted in the corrected energetic span analysis for both methanol and CO formation. “Reference state” refers to the clean surface plus gas-phase reactants, corresponding to  $G_{\text{TDI}} = 0$  on the adopted free-energy scale.

**Table S9.** Summary of TDTS assignments in MKM and descriptor analyses for methanol and CO formation at 500 K.

| Surface                                 | MKM TDTS |         | $G_{\text{span}}$ TDTS |                     | $G_{\text{HL}}$ TDTS |                     |
|-----------------------------------------|----------|---------|------------------------|---------------------|----------------------|---------------------|
|                                         | MeOH     | CO      | MeOH                   | CO                  | MeOH                 | CO                  |
| Cu <sub>2</sub> In(110)                 | H-HCOOH* | CO-O*   | H-HCOOH*               | CO-O*               | H-HCOOH*             | CO-O*               |
| Cu <sub>7</sub> In <sub>3</sub> (040)-a | H-OH*    | H-OH*   | H-OH*                  | CO-O*               | H-OH*                | CO-O*               |
| Cu <sub>7</sub> In <sub>3</sub> (040)-b | H-HCOOH* | CO-O*   | H-HCOOH*               | H-H <sub>2</sub> O* | H-HCOOH*             | H-H <sub>2</sub> O* |
| Cu <sub>11</sub> In <sub>9</sub> (020)  | H-HCOOH* | CO-O*   | H-HCOOH*               | CO-O*               | H-HCOOH*             | CO-O*               |
| Cu <sub>11</sub> In <sub>9</sub> (551)  | H-HCOOH* | H-COOH* | H-HCOOH*               | H-COOH*             | H-HCOOH*             | H-COOH*             |

**Note:** TDTS denotes the transition state controlling the corresponding reaction channel. For CO formation on Cu<sub>7</sub>In<sub>3</sub>(040)-b, H-H<sub>2</sub>O\* and CO-O\* differ by only 0.06 eV and are therefore considered nearly degenerate.

**Table S10.** Summary of energetic descriptors for methanol and CO formation on five Cu–In surfaces at 500 K.

| Surface                                 | $G_{\text{eff}}$ |      | $G_{\text{span}}$ |      | $G_{\text{HL}}$ |      |
|-----------------------------------------|------------------|------|-------------------|------|-----------------|------|
|                                         | MeOH             | CO   | MeOH              | CO   | MeOH            | CO   |
| Cu <sub>2</sub> In(110)                 | 1.63             | 1.62 | 1.63              | 1.62 | 1.63            | 1.62 |
| Cu <sub>7</sub> In <sub>3</sub> (040)-a | 1.34             | 1.42 | 1.40              | 1.54 | 1.45            | 1.54 |
| Cu <sub>7</sub> In <sub>3</sub> (040)-b | 1.53             | 1.31 | 1.64              | 1.50 | 1.64            | 1.51 |
| Cu <sub>11</sub> In <sub>9</sub> (020)  | 1.78             | 1.54 | 1.86              | 1.70 | 1.86            | 1.70 |
| Cu <sub>11</sub> In <sub>9</sub> (551)  | 1.63             | 1.67 | 1.81              | 1.85 | 1.82            | 1.86 |

**Note:**  $G_{\text{eff}}$  is the conventional PES-derived energetic span;  $G_{\text{span}}$  is the TDI-corrected energetic span including the site-requirement correction; and  $G_{\text{HL}}$  is the descriptor obtained from the Gibbs formation-energy scheme using the identified TDTS and TDI. All values are given in eV under the descriptor-analysis conditions.

## 5. Identification of the preferred reaction pathway

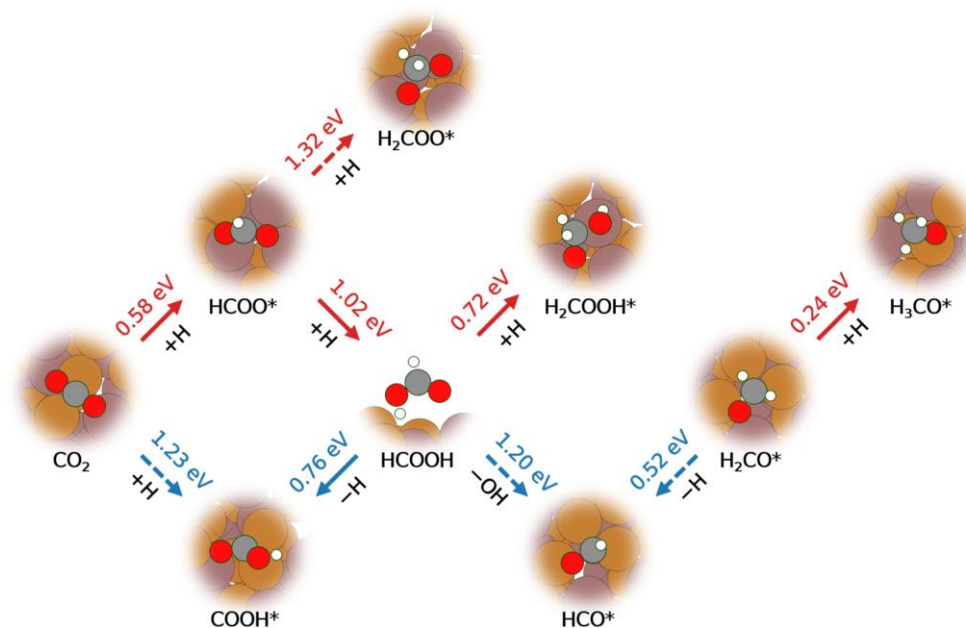

**Fig. S18.** Branching pathways at the Cu<sub>11</sub>In<sub>9</sub>(551) for methanol and CO formation. Red and blue arrows denote the methanol and CO formation pathways, respectively; dashed arrows indicate kinetically unfavorable pathways, and the numbers on the arrows represent the energy barriers according to the branched reaction energy diagram for each step. The color scheme of atoms: Cu, orange; In, brown; O, red; C, gray; H, white.

### Note:

Starting from CO<sub>2</sub>, hydrogenation preferentially proceeds via the H-COO\* transition state to form HCOO\*, which is kinetically favored over the alternative COOH-forming pathway. Subsequent hydrogenation of HCOO\* preferentially yields HCOOH\* rather than H<sub>2</sub>COO\*, consistent with the lower free energy of the corresponding transition state. From HCOOH\*, continued hydrogenation toward H<sub>2</sub>COOH\* is kinetically favored over dehydrogenation or direct C-O bond cleavage, ultimately leading to methanol formation. The alternative CO formation pathway proceeds via dehydrogenation to COOH\* followed by C-O bond cleavage, in agreement with the TDTS assignments discussed in the main text.

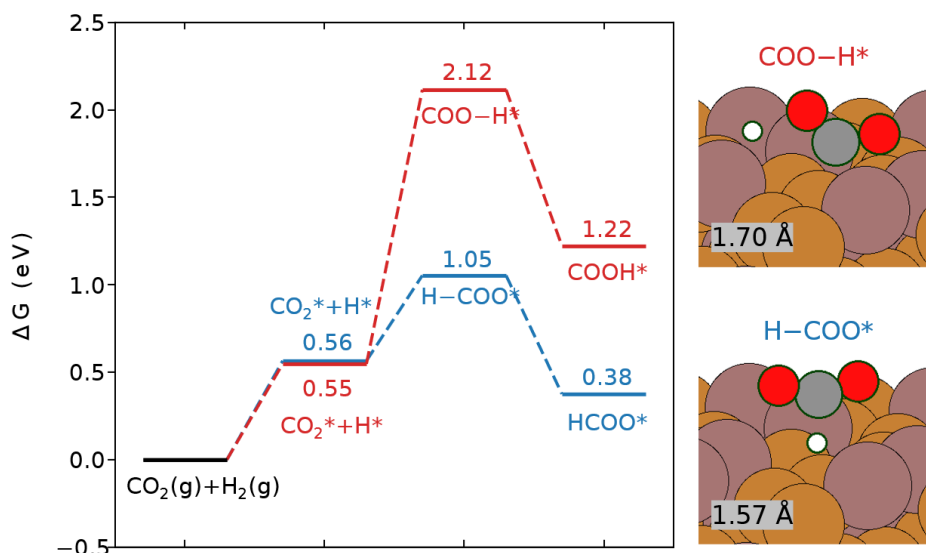

**Fig. S19.** Gibbs free energy diagram and transition state structures for the initial steps of CO<sub>2</sub> hydrogenation on Cu<sub>2</sub>In(110) at 500 K under partial pressures of 22.5 bar H<sub>2</sub> and 7.5 bar CO<sub>2</sub>. The color scheme of atoms is as follows: Cu, orange; In, brown; O, red; C, gray; H, white.

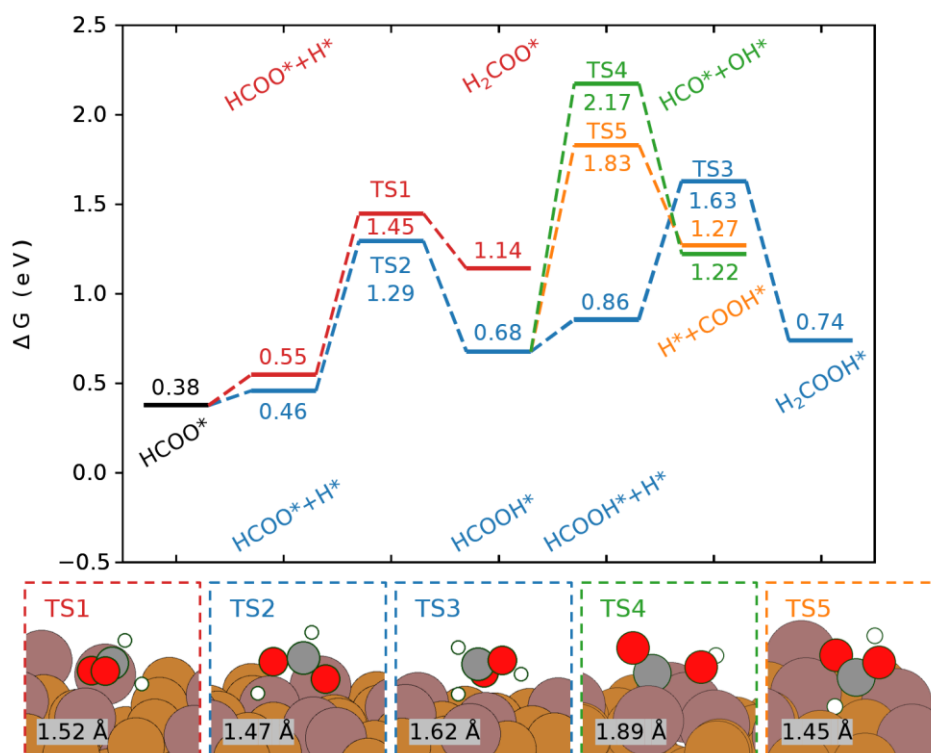

**Fig. S20.** Gibbs free energy diagram and representative transition state structures for competing reaction pathways originating from HCOO\* on Cu<sub>2</sub>In(110) at 500 K, including hydrogenation and dissociation routes relevant to CO<sub>2</sub> hydrogenation. The color scheme of atoms: Cu, orange; In, brown; O, red; C, gray; H, white.

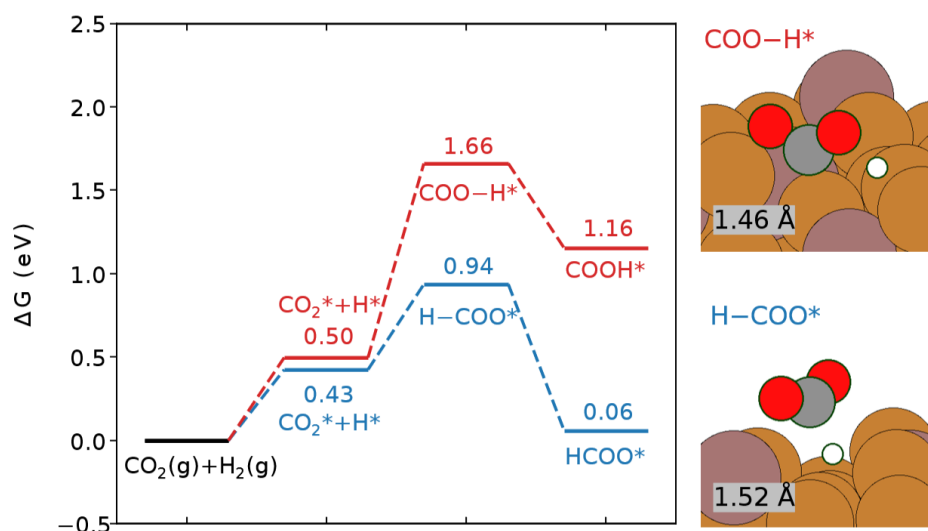

**Fig. S21.** Gibbs free energy diagram and transition state structures for the initial steps of CO<sub>2</sub> hydrogenation on Cu<sub>7</sub>In<sub>3</sub>(040)-a at 500 K under partial pressures of 22.5 bar H<sub>2</sub> and 7.5 bar CO<sub>2</sub>. The color scheme of atoms is as follows: Cu, orange; In, brown; O, red; C, gray; H, white.

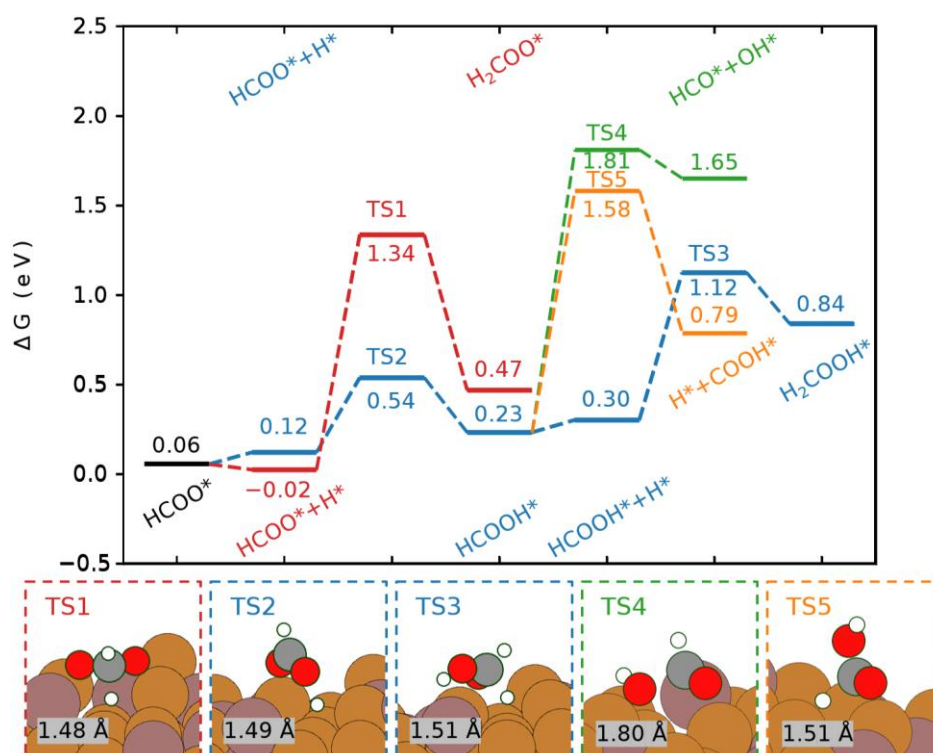

**Fig. S22.** Gibbs free energy diagram and representative transition state structures for competing reaction pathways originating from HCOO\* on Cu<sub>7</sub>In<sub>3</sub>(040)-a at 500 K, including hydrogenation and dissociation routes relevant to CO<sub>2</sub> hydrogenation. The color scheme of atoms: Cu, orange; In, brown; O, red; C, gray; H, white.

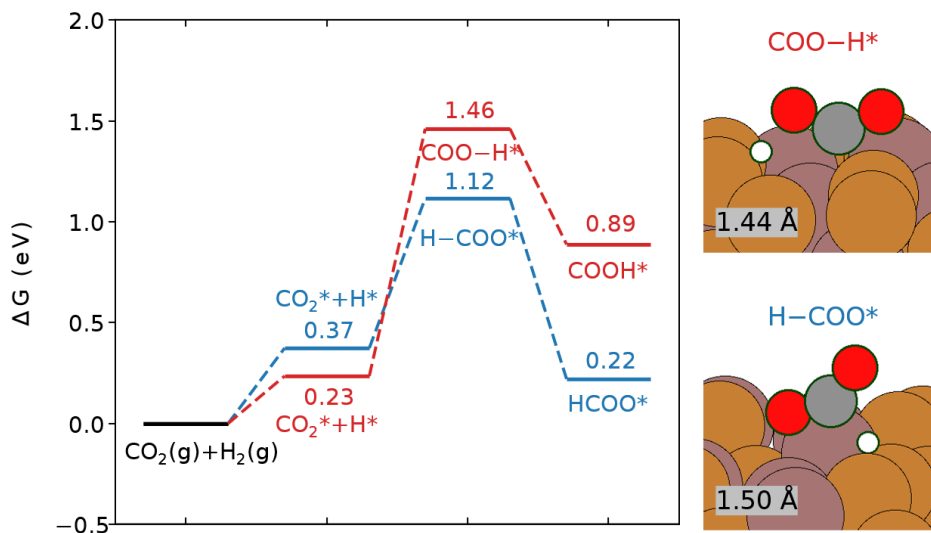

**Fig. S23.** Gibbs free energy diagram and transition state structures for the initial steps of  $\text{CO}_2$  hydrogenation on  $\text{Cu}_7\text{In}_3(040)\text{-b}$  at 500 K under partial pressures of 22.5 bar  $\text{H}_2$  and 7.5 bar  $\text{CO}_2$ . The color scheme of atoms is as follows: Cu, orange; In, brown; O, red; C, gray; H, white.

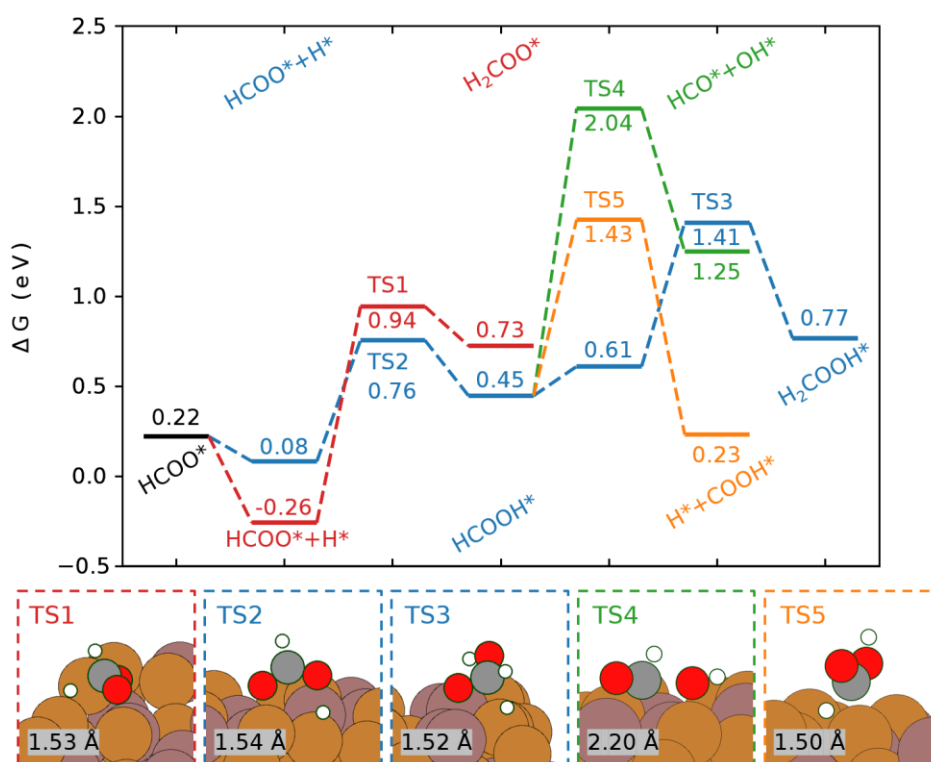

**Fig. S24.** Gibbs free energy diagram and representative transition state structures for competing reaction pathways originating from  $\text{HCOO}^*$  on  $\text{Cu}_7\text{In}_3(040)\text{-b}$  at 500 K, including hydrogenation and dissociation routes relevant to  $\text{CO}_2$  hydrogenation. The color scheme of atoms: Cu, orange; In, brown; O, red; C, gray; H, white.

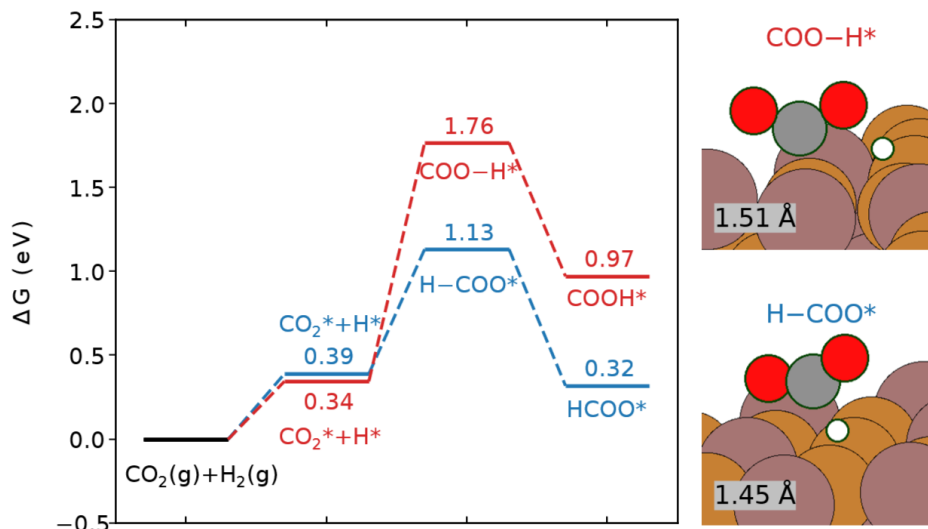

**Fig. S25.** Gibbs free energy diagram and transition state structures for the initial steps of CO<sub>2</sub> hydrogenation on Cu<sub>11</sub>In<sub>9</sub>(020) at 500 K under partial pressures of 22.5 bar H<sub>2</sub> and 7.5 bar CO<sub>2</sub>. The color scheme of atoms is as follows: Cu, orange; In, brown; O, red; C, gray; H, white.

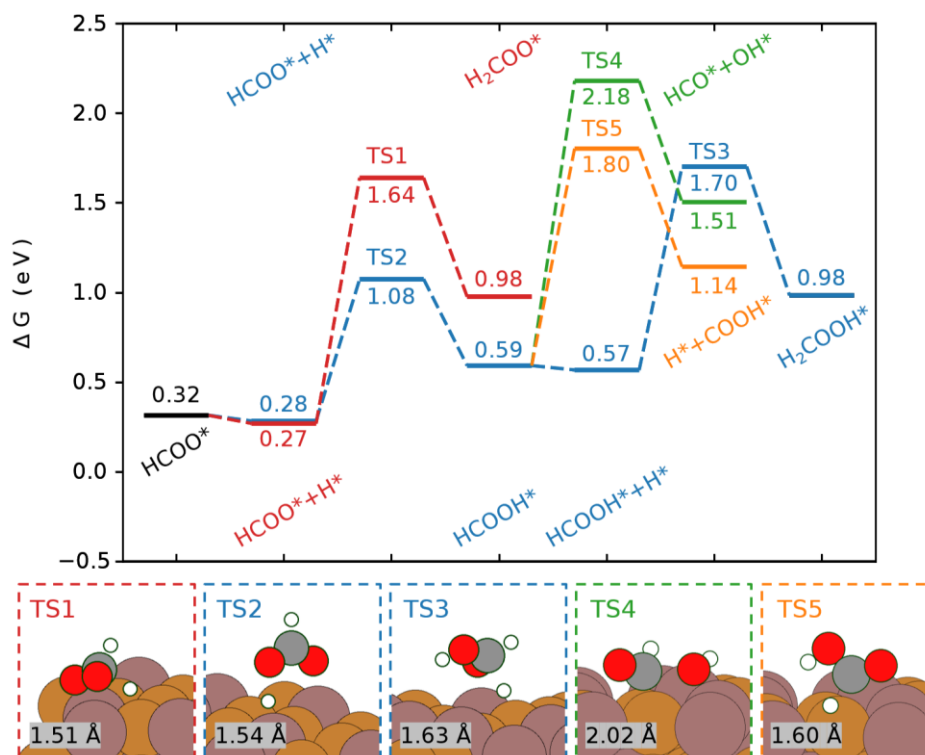

**Fig. S26.** Gibbs free energy diagram and representative transition state structures for competing reaction pathways originating from HCOO\* on Cu<sub>11</sub>In<sub>9</sub>(020) at 500 K, including hydrogenation and dissociation routes relevant to CO<sub>2</sub> hydrogenation. The color scheme of atoms: Cu, orange; In, brown; O, red; C, gray; H, white.

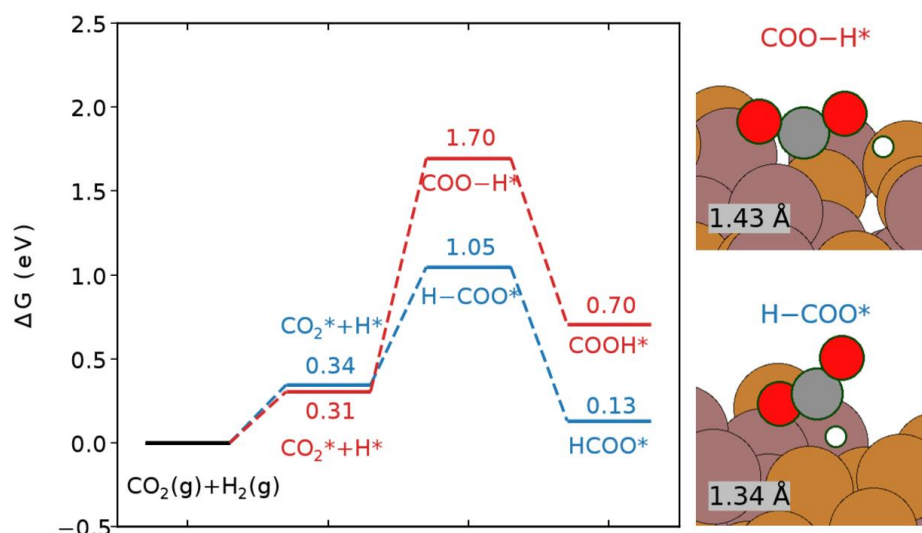

**Fig. S27.** Gibbs free energy diagram and transition state structures for the initial steps of CO<sub>2</sub> hydrogenation on Cu<sub>11</sub>In<sub>9</sub>(551) at 500 K under partial pressures of 22.5 bar H<sub>2</sub> and 7.5 bar CO<sub>2</sub>. The color scheme of atoms is as follows: Cu, orange; In, brown; O, red; C, gray; H, white.

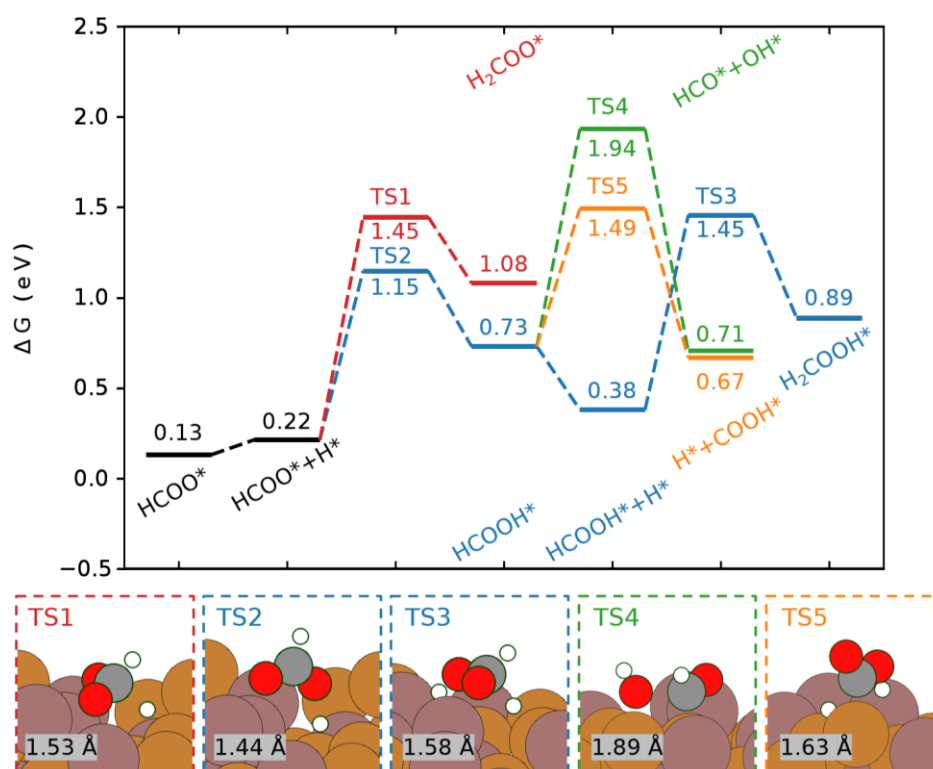

**Fig. S28.** Gibbs free energy diagram and representative transition state structures for competing reaction pathways originating from HCOO\* on Cu<sub>11</sub>In<sub>9</sub>(551) at 500 K, including hydrogenation and dissociation routes relevant to CO<sub>2</sub> hydrogenation. The color scheme of atoms: Cu, orange; In, brown; O, red; C, gray; H, white.

## 6. Extended analysis and validation of the $G_{HL}$ descriptor

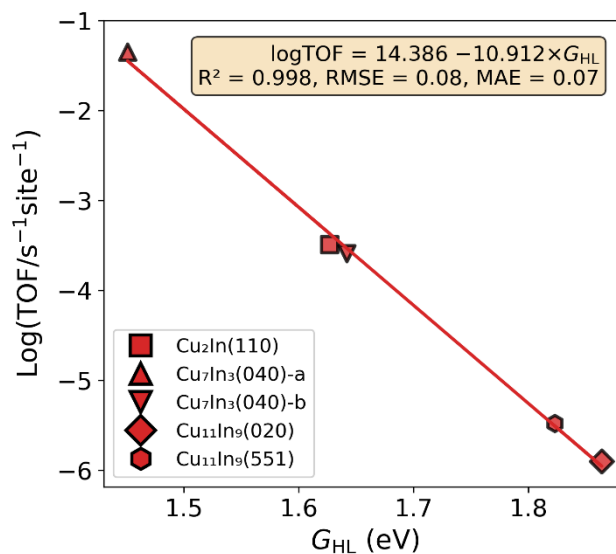

**Fig. S29.** Correlation between the logarithm of the reaction rates and the  $G_{HL}$  descriptor for methanol formation across five Cu–In surfaces at 500 K.

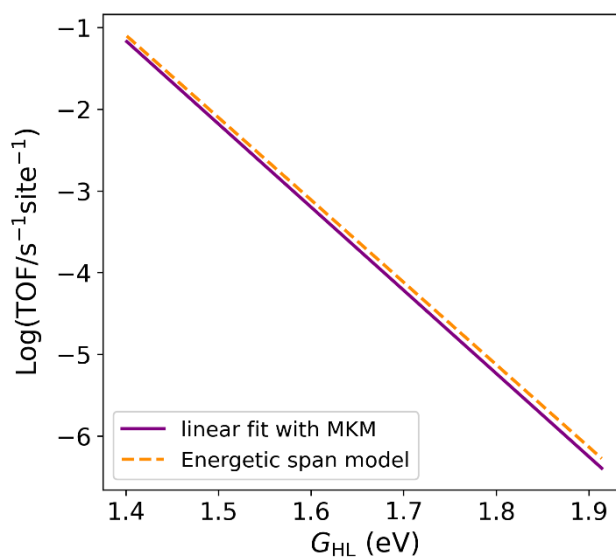

**Fig. S30.** Comparison between the linear fit obtained from the  $G_{HL}$  descriptor and MKM-derived TOFs and the rate–barrier relationship predicted directly from the energetic span model at 500 K.

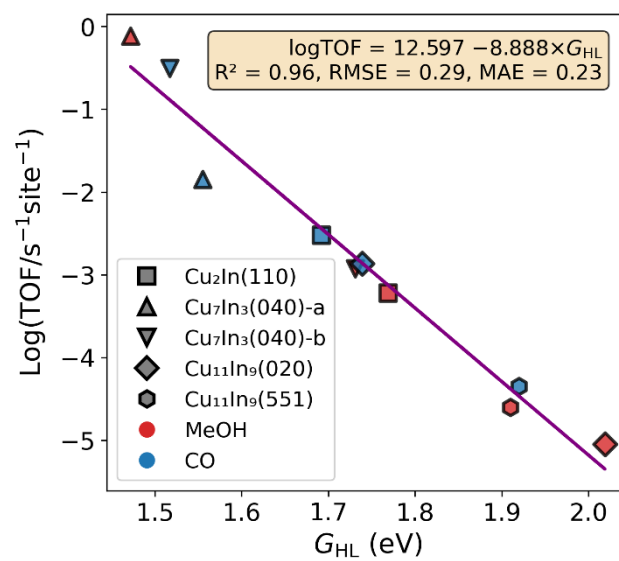

**Fig. S31.** Correlation between the logarithm of the reaction rates and the  $G_{HL}$  descriptor for methanol and CO formation across five Cu–In surfaces at 550 K.

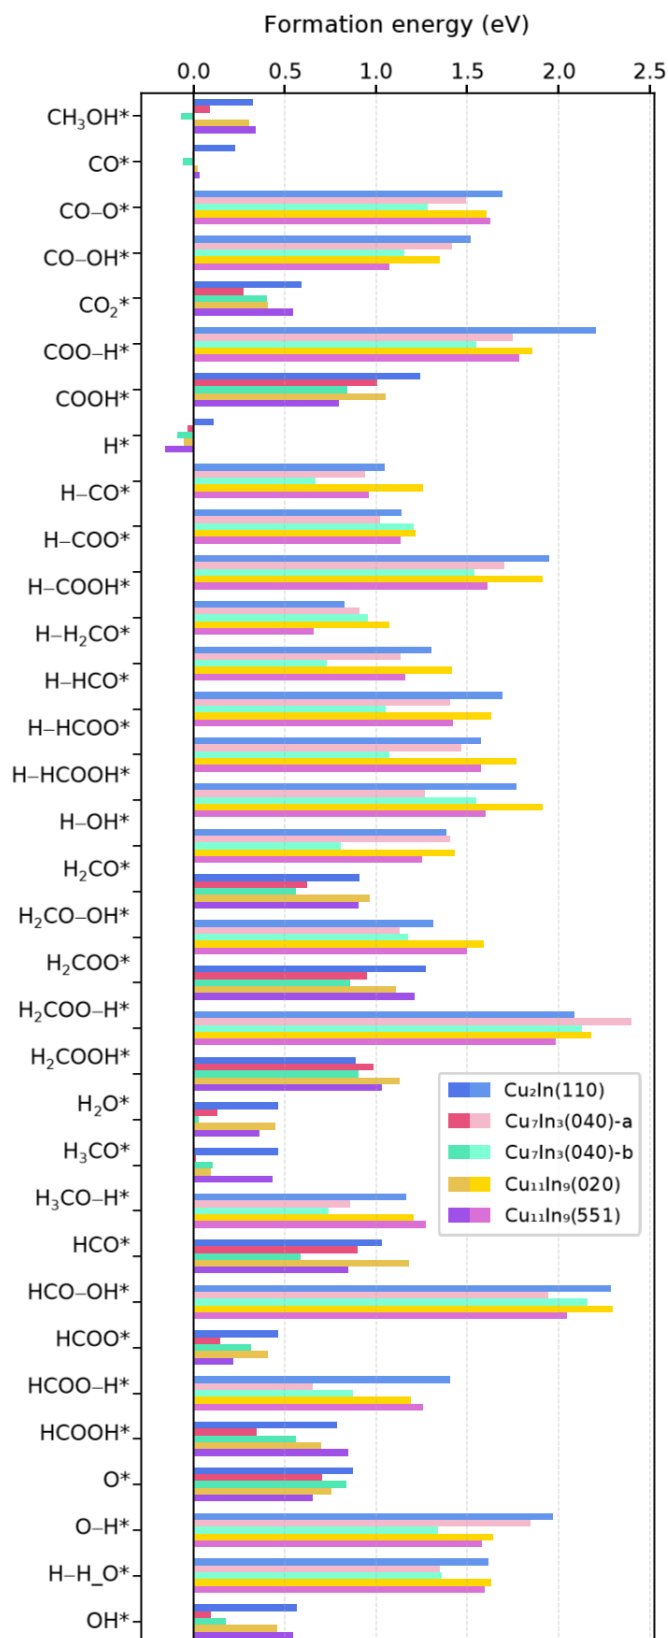

**Fig. S32.** Relative Gibbs free energies of formation of surface intermediates and transition states at 550 K, evaluated with respect to the gas-phase chemical potentials ( $H_2$ ,  $CO_2$ ,  $H_2O$ ) under reaction conditions with partial pressures of 22.5 bar  $H_2$ , 7.5 bar  $CO_2$ , and 1 bar each of  $CO$ ,  $H_2O$ , and  $MeOH$ . Dark-colored bars denote intermediates, while light-colored bars represent transition states.

**Note:**

At 550 K, H\* is identified as the lowest-formation-energy intermediate on all surfaces, resolving the H<sub>3</sub>CO\* deviation observed on Cu<sub>7</sub>In<sub>3</sub>(040)-a at 500 K.
